# Supplementary material for: The E2 Marie Kondo and the CTLH E3 ligase clear deposited RNA binding proteins during the maternal-to-zygotic transition
Source: eLife. 2020 Jun 23;9:e53889. doi: 10.7554/eLife.53889 (PMC7384856; doi:10.7554/eLife.53889)
Supplement: Figure 4—source data 1. [file elife-53889-fig4-data1.xlsx]

## Sheet: Sheet1
Figure 4-Source Table 1. ME31B immunoprecipitaiton/mass spectrometry results
Identified Proteins (191/202)	Accession Number	Alternate ID	Molecular Weight	Protein Grouping Ambiguity	Taxonomy	GFP 1-2 hr	IgG 1-2 hr	GFP 2-3 hr	IgG 2-3 hr
Trailer hitch, isoform C OS=Drosophila melanogaster GN=tral PE=1 SV=1	M9PF14_DROME (+1)		70 kDa	TRUE	unknown	106	8	66	26
Putative ATP-dependent RNA helicase me31b OS=Drosophila melanogaster GN=me31B PE=1 SV=3	DDX6_DROME		52 kDa		unknown	54	1	55	7
Protein cup OS=Drosophila melanogaster GN=cup PE=1 SV=3	CUP_DROME		126 kDa		unknown	41	0	27	1
RH35990p (Fragment) OS=Drosophila melanogaster GN=lost PE=2 SV=1	Q8IGE9_DROME (+1)		59 kDa		unknown	25	0	25	0
ATP-dependent RNA helicase p62 OS=Drosophila melanogaster GN=Rm62 PE=1 SV=3	DDX17_DROME		79 kDa	FALSE	unknown	21	0	16	11
ATP-dependent RNA helicase bel OS=Drosophila melanogaster GN=bel PE=1 SV=1	DDX3_DROME (+1)		85 kDa	FALSE	unknown	22	4	22	15
AT11715p OS=Drosophila melanogaster GN=muskelin PE=2 SV=1	Q8MR83_DROME		97 kDa		unknown	15	0	7	0
Polyadenylate-binding protein OS=Drosophila melanogaster GN=pAbp PE=1 SV=3	PABP_DROME		70 kDa		unknown	14	0	8	1
Ran-binding protein M, isoform E OS=Drosophila melanogaster GN=RanBPM PE=1 SV=1	A0A0B4K851_DROME (+1)		107 kDa	TRUE	unknown	14	0	10	0
RH09117p OS=Drosophila melanogaster GN=CG42236-RD PE=2 SV=1	C4IY22_DROME (+1)		107 kDa	TRUE	unknown	14	0	11	0
Tubulin beta-1 chain OS=Drosophila melanogaster GN=betaTub56D PE=1 SV=2	TBB1_DROME		50 kDa		unknown	12	0	19	3
Replication protein A 70 kDa DNA-binding subunit OS=Drosophila melanogaster GN=RpA-70 PE=1 SV=1	RFA1_DROME		67 kDa		unknown	17	6	15	12
BcDNA.LD27979 OS=Drosophila melanogaster GN=Patr-1 PE=2 SV=1	Q7KK29_DROME (+1)		103 kDa		unknown	11	0	17	0
Enhancer of mRNA-decapping protein 3 OS=Drosophila melanogaster GN=Edc3 PE=1 SV=1	EDC3_DROME		73 kDa		unknown	11	0	10	0
LD37574p OS=Drosophila melanogaster GN=yps PE=1 SV=1	Q95RE4_DROME		38 kDa		unknown	11	0	4	1
CG9436 OS=Drosophila melanogaster GN=CG9436 PE=1 SV=1	Q7JVH6_DROME		35 kDa		unknown	10	0	9	7
GH10652p OS=Drosophila melanogaster GN=CG10077 PE=1 SV=1	Q8MZI3_DROME		88 kDa	FALSE	unknown	9	0	4	4
Heat shock 70 kDa protein cognate 4 OS=Drosophila melanogaster GN=Hsc70-4 PE=1 SV=3	HSP7D_DROME		71 kDa		unknown	9	0	6	1
Tubulin alpha-1 chain OS=Drosophila melanogaster GN=alphaTub84B PE=2 SV=1	TBA1_DROME		50 kDa	TRUE	unknown	8	0	17	3
40S ribosomal protein S19a OS=Drosophila melanogaster GN=RpS19a PE=1 SV=3	RS19A_DROME		17 kDa		unknown	8	0	8	2
LD32873p OS=Drosophila melanogaster GN=CG10777 PE=1 SV=1	Q9W3M7_DROME		100 kDa	FALSE	unknown	8	0	7	7
40S ribosomal protein S2 OS=Drosophila melanogaster GN=RpS2 PE=1 SV=2	RS2_DROME		29 kDa		unknown	8	0	8	1
Eukaryotic translation initiation factor 4E OS=Drosophila melanogaster GN=eIF-4E PE=1 SV=1	IF4E_DROME (+1)		29 kDa		unknown	8	0	2	1
IGF-II mRNA-binding protein, isoform K OS=Drosophila melanogaster GN=Imp PE=1 SV=2	Q0KHU2_DROME (+1)		69 kDa		unknown	8	0	2	0
5'-3' exoribonuclease 2 homolog OS=Drosophila melanogaster GN=Rat1 PE=1 SV=2	XRN2_DROME		104 kDa	TRUE	unknown	9	2	7	13
Pyruvate kinase OS=Drosophila melanogaster GN=PyK PE=2 SV=2	KPYK_DROME		57 kDa		unknown	8	1	14	5
40S ribosomal protein S3a OS=Drosophila melanogaster GN=RpS3A PE=1 SV=4	RS3A_DROME		30 kDa		unknown	8	1	12	4
40S ribosomal protein S14 OS=Drosophila melanogaster GN=RpS14a PE=1 SV=1	RS14_DROME		16 kDa		unknown	7	0	4	2
CG6084, isoform D OS=Drosophila melanogaster GN=CG6084 PE=1 SV=1	M9PI17_DROME		36 kDa		unknown	6	0	9	6
CG30122, isoform B OS=Drosophila melanogaster GN=CG30122 PE=1 SV=1	A1ZBB4_DROME (+2)		140 kDa		unknown	6	0	3	2
FI09342p (Fragment) OS=Drosophila melanogaster GN=RpS18-RB PE=2 SV=1	B6IDT0_DROME (+1)		20 kDa		unknown	6	0	3	0
IP15838p (Fragment) OS=Drosophila melanogaster PE=2 SV=1	Q29QY2_DROME (+2)		28 kDa		unknown	6	0	8	0
Fmr1, isoform G OS=Drosophila melanogaster GN=Fmr1 PE=1 SV=1	A0A0B4K618_DROME		81 kDa		unknown	6	0	2	1
CG5787, isoform A OS=Drosophila melanogaster GN=CG5787 PE=1 SV=2	Q9VK59_DROME		100 kDa		unknown	6	0	4	0
CG3295 OS=Drosophila melanogaster GN=CG3295 PE=1 SV=1	Q9W2N5_DROME		49 kDa		unknown	6	0	4	0
Squid, isoform E OS=Drosophila melanogaster GN=sqd PE=4 SV=1	A0A0B4K6U6_DROME (+1)		33 kDa		unknown	5	0	2	3
Gustavus, isoform G OS=Drosophila melanogaster GN=gus PE=4 SV=1	A0A0B4K6X3_DROME (+1)		32 kDa		unknown	5	0	5	0
Protein Smaug OS=Drosophila melanogaster GN=smg PE=1 SV=2	SMG_DROME		109 kDa		unknown	5	0	2	0
CG31357 OS=Drosophila melanogaster GN=CG13638 PE=1 SV=1	Q8MSB1_DROME		45 kDa		unknown	5	0	4	0
Ribosomal protein S11 (Fragment) OS=Drosophila melanogaster GN=RPS11 PE=3 SV=1	L0CPK9_DROME (+6)		18 kDa		unknown	5	0	3	0
40S ribosomal protein S5a OS=Drosophila melanogaster GN=RpS5a PE=1 SV=1	RS5A_DROME		25 kDa	TRUE	unknown	5	0	5	0
40S ribosomal protein S5b OS=Drosophila melanogaster GN=RpS5b PE=2 SV=1	RS5B_DROME		26 kDa	TRUE	unknown	4	0	5	0
Heterogeneous nuclear ribonucleoprotein at 98DE, isoform C OS=Drosophila melanogaster GN=Hrb98DE PE=1 SV=1	A4V3J5_DROME (+5)		39 kDa	TRUE	unknown	4	0	5	2
IP04948p OS=Drosophila melanogaster GN=CG4279 PE=2 SV=1	Q4V6R8_DROME (+1)		16 kDa		unknown	4	0	6	0
RH14172p (Fragment) OS=Drosophila melanogaster GN=RpS10b-RB PE=2 SV=1	B7ZWP7_DROME (+2)		21 kDa		unknown	4	0	5	0
RE25356p OS=Drosophila melanogaster PE=2 SV=1	D5AEL0_DROME (+2)		78 kDa		unknown	4	0	2	0
Heterogeneous nuclear ribonucleoprotein 87F OS=Drosophila melanogaster GN=Hrb87F PE=2 SV=2	RB87F_DROME		39 kDa	TRUE	unknown	5	2	7	5
rRNA 2'-O-methyltransferase fibrillarin OS=Drosophila melanogaster GN=Fib PE=2 SV=1	FBRL_DROME		35 kDa		unknown	4	1	4	4
RH55360p OS=Drosophila melanogaster GN=RPA3 PE=1 SV=1	Q9VYW3_DROME		12 kDa		unknown	3	0	4	3
Histone H4 OS=Drosophila melanogaster GN=His4 PE=1 SV=2	H4_DROME		11 kDa		unknown	3	0	2	3
Tubulin alpha-4 chain OS=Drosophila melanogaster GN=alphaTub67C PE=3 SV=1	TBA4_DROME		51 kDa	TRUE	unknown	3	0	6	0
Glutathione S-transferase D1 OS=Drosophila melanogaster GN=GstD1 PE=1 SV=1	GSTD1_DROME		24 kDa		unknown	3	0	3	2
Ribosomal protein S15, isoform B OS=Drosophila melanogaster GN=RpS15 PE=1 SV=1	A1ZAH8_DROME (+1)		17 kDa		unknown	3	0	4	0
Ubiquitin-63E, isoform C OS=Drosophila melanogaster GN=Ubi-p63E PE=4 SV=1	A4V1F9_DROME (+19)		86 kDa		unknown	3	0	3	1
GH04763p (Fragment) OS=Drosophila melanogaster GN=CG11183 PE=2 SV=1	Q52KA4_DROME (+1)		43 kDa		unknown	3	0	5	0
Ataxin-2 homolog OS=Drosophila melanogaster GN=Atx2 PE=1 SV=1	ATX2_DROME		118 kDa		unknown	3	0	4	0
40S ribosomal protein S8 OS=Drosophila melanogaster GN=RpS8 PE=1 SV=1	RS8_DROME		24 kDa		unknown	3	0	3	0
40S ribosomal protein S25 OS=Drosophila melanogaster GN=RpS25 PE=1 SV=3	RS25_DROME		13 kDa		unknown	3	0	3	0
CG6617 OS=Drosophila melanogaster GN=CG6617 PE=1 SV=1	Q9VWS1_DROME		26 kDa		unknown	3	0	3	0
EG:115C2.4 protein OS=Drosophila melanogaster GN=SkpA PE=1 SV=1	O77430_DROME		19 kDa		unknown	3	0	1	1
LD40489p OS=Drosophila melanogaster GN=SF2 PE=1 SV=1	Q9V3W7_DROME		28 kDa		unknown	3	0	1	0
RNA-binding protein cabeza OS=Drosophila melanogaster GN=caz PE=2 SV=2	CAZ_DROME		39 kDa		unknown	7	5	6	7
Nucleoprotein TPR OS=Drosophila melanogaster GN=Mtor PE=1 SV=1	TPR_DROME		262 kDa		unknown	2	0	1	3
eIF4E-Transporter, isoform H OS=Drosophila melanogaster GN=4E-T PE=1 SV=1	L0MLQ9_DROME (+1)		111 kDa		unknown	2	0	5	2
40S ribosomal protein S7 OS=Drosophila melanogaster GN=RpS7 PE=1 SV=1	RS7_DROME		22 kDa		unknown	2	0	2	2
Elongation factor 1-alpha 1 OS=Drosophila melanogaster GN=Ef1alpha48D PE=1 SV=2	EF1A1_DROME (+1)		50 kDa		unknown	2	0	5	1
40S ribosomal protein S17 OS=Drosophila melanogaster GN=RpS17 PE=1 SV=2	RS17_DROME		15 kDa		unknown	2	0	3	1
40S ribosomal protein S4 OS=Drosophila melanogaster GN=RpS4 PE=1 SV=2	RS4_DROME (+1)		29 kDa		unknown	2	0	4	1
RNA polymerase II transcriptional coactivator OS=Drosophila melanogaster GN=Ssb-c31a PE=2 SV=1	TCP4_DROME		12 kDa		unknown	2	0	2	1
Ribosomal protein L15 OS=Drosophila melanogaster GN=RpL15 PE=1 SV=2	A8Y560_DROME (+1)		24 kDa		unknown	2	0	2	1
40S ribosomal protein SA OS=Drosophila melanogaster GN=sta-RD PE=2 SV=1	C6SV50_DROME (+2)		35 kDa		unknown	2	0	3	0
FI01531p OS=Drosophila melanogaster GN=CG4038 PE=2 SV=1	A8E6K0_DROME (+1)		23 kDa		unknown	2	0	1	3
Pacman, isoform B OS=Drosophila melanogaster GN=pcm PE=1 SV=1	E1JJR3_DROME (+1)		185 kDa	TRUE	unknown	2	0	2	0
40S ribosomal protein S15Aa OS=Drosophila melanogaster GN=RpS15Aa PE=1 SV=2	RS15A_DROME		15 kDa		unknown	2	0	3	0
GH13725p OS=Drosophila melanogaster GN=Tcp-1zeta PE=1 SV=1	Q9VXQ5_DROME		58 kDa		unknown	2	0	4	0
MIP05689p (Fragment) OS=Drosophila melanogaster GN=Nop60B-RC PE=2 SV=1	C0P8M5_DROME (+2)		60 kDa		unknown	2	0	1	1
FI07244p OS=Drosophila melanogaster GN=LSm-4-RB PE=1 SV=3	Q9VKW8_DROME		17 kDa		unknown	2	0	3	0
40S ribosomal protein S13 OS=Drosophila melanogaster GN=RpS13 PE=1 SV=3	RS13_DROME		17 kDa		unknown	2	0	3	0
Casein kinase ialpha, isoform D OS=Drosophila melanogaster GN=CkIalpha PE=1 SV=1	E1JJI5_DROME (+1)		40 kDa		unknown	2	0	1	0
40S ribosomal protein S16 OS=Drosophila melanogaster GN=RpS16 PE=1 SV=1	RS16_DROME		17 kDa		unknown	2	0	2	0
LP18839p1 (Fragment) OS=Drosophila melanogaster GN=RpS29-RA PE=2 SV=1	I7CP40_DROME (+3)		7 kDa		unknown	2	0	2	0
LD13662p OS=Drosophila melanogaster GN=RpS9 PE=1 SV=1	C6SUW3_DROME (+1)		23 kDa		unknown	2	0	3	0
Protein argonaute-2 OS=Drosophila melanogaster GN=AGO2 PE=1 SV=3	AGO2_DROME		137 kDa		unknown	2	0	1	0
Guanine nucleotide-binding protein subunit beta-like protein OS=Drosophila melanogaster GN=Rack1 PE=1 SV=2	GBLP_DROME (+1)		36 kDa		unknown	2	0	2	0
Protein abnormal spindle OS=Drosophila melanogaster GN=asp PE=1 SV=3	ASP_DROME (+1)		230 kDa		unknown	2	0	1	0
RE11655p OS=Drosophila melanogaster GN=LSm3 PE=2 SV=1	Q8IGW7_DROME (+1)		12 kDa		unknown	2	0	1	0
Interleukin enhancer-binding factor 2 homolog OS=Drosophila melanogaster GN=CG5641 PE=2 SV=1	ILF2_DROME		44 kDa		unknown	2	0	1	0
FI21236p1 OS=Drosophila melanogaster GN=rump PE=1 SV=1	Q9VHC7_DROME		67 kDa		unknown	2	0	0	0
GM24606p (Fragment) OS=Drosophila melanogaster GN=oho23B-RE PE=2 SV=1	E4NKJ9_DROME		11 kDa		unknown	2	0	0	0
60S ribosomal protein L22 OS=Drosophila melanogaster GN=RpL22 PE=1 SV=2	RL22_DROME		31 kDa		unknown	2	0	1	0
RNA-binding protein lark OS=Drosophila melanogaster GN=lark PE=1 SV=1	LARK_DROME		40 kDa		unknown	2	0	0	0
Supernumerary limbs, isoform B OS=Drosophila melanogaster GN=slmb PE=4 SV=1	A0A0B4KHK1_DROME (+2)		69 kDa		unknown	2	0	0	0
Actin-5C OS=Drosophila melanogaster GN=Act5C PE=1 SV=4	ACT1_DROME (+1)		42 kDa	TRUE	unknown	3	2	4	6
CG9273 protein OS=Drosophila melanogaster GN=CG9273 PE=4 SV=1	A0ANL8_DROME (+3)		26 kDa		unknown	3	2	3	3
Eukaryotic translation initiation factor 3 subunit D-1 OS=Drosophila melanogaster GN=eIF-3p66 PE=1 SV=1	EI3D1_DROME		64 kDa		unknown	1	0	1	1
CG6610, isoform A OS=Drosophila melanogaster GN=CG6610 PE=1 SV=1	Q9VRT7_DROME		10 kDa		unknown	1	0	2	0
Tcp1-like, isoform B OS=Drosophila melanogaster GN=T-cp1 PE=1 SV=1	A4V391_DROME (+1)		60 kDa		unknown	1	0	1	0
GM25235p OS=Drosophila melanogaster GN=CG1622-RA PE=2 SV=1	E8NH69_DROME (+2)		25 kDa		unknown	1	0	1	1
Protein virilizer OS=Drosophila melanogaster GN=vir PE=1 SV=1	VIR_DROME		209 kDa		unknown	1	0	0	0
Histone H2B OS=Drosophila melanogaster GN=His2B PE=1 SV=2	H2B_DROME		14 kDa		unknown	1	0	0	0
40S ribosomal protein S20 OS=Drosophila melanogaster GN=RpS20 PE=1 SV=1	RS20_DROME		13 kDa		unknown	1	0	1	0
Par-1, isoform H OS=Drosophila melanogaster GN=par-1 PE=1 SV=1	A1ZBL7_DROME (+7)		108 kDa		unknown	1	0	0	1
Uncharacterized protein OS=Drosophila melanogaster GN=CG10418 PE=1 SV=1	Q9VTW6_DROME		11 kDa		unknown	1	0	2	0
Single-stranded DNA-binding protein, mitochondrial OS=Drosophila melanogaster GN=mtSSB PE=1 SV=2	SSBP_DROME		16 kDa		unknown	1	0	0	0
RE62581p OS=Drosophila melanogaster GN=RpL21 PE=1 SV=1	Q9V9M7_DROME		18 kDa		unknown	1	0	1	0
Zinc-finger protein at 72D, isoform B OS=Drosophila melanogaster GN=Zn72D PE=1 SV=1	Q86BI3_DROME		96 kDa		unknown	1	0	0	0
IP19982p (Fragment) OS=Drosophila melanogaster GN=RpS6 PE=2 SV=1	A8E700_DROME		21 kDa		unknown	1	0	1	0
U2 small nuclear riboprotein auxiliary factor 38, isoform B OS=Drosophila melanogaster GN=U2af38 PE=4 SV=1	M9PBM1_DROME (+1)		30 kDa		unknown	1	0	0	1
RH74732p (Fragment) OS=Drosophila melanogaster GN=CG2807 PE=2 SV=1	Q4V5E9_DROME (+1)		147 kDa		unknown	1	0	1	0
Elongin C, isoform A OS=Drosophila melanogaster GN=EloC PE=1 SV=1	Q7JWD6_DROME (+1)		13 kDa		unknown	1	0	1	0
Protein bicaudal C OS=Drosophila melanogaster GN=BicC PE=1 SV=2	BICC_DROME		98 kDa		unknown	1	0	0	0
B52, isoform O OS=Drosophila melanogaster GN=B52 PE=4 SV=1	A0A0C4DHG5_DROME (+1)		40 kDa		unknown	1	0	0	0
Transposable element P transposase OS=Drosophila melanogaster GN=T PE=1 SV=2	PELET_DROME		87 kDa		unknown	1	0	0	0
BcDNA.GH11110 OS=Drosophila melanogaster GN=nito PE=1 SV=1	Q7KMJ6_DROME		89 kDa		unknown	1	0	0	0
NEDD8 OS=Drosophila melanogaster GN=Nedd8 PE=1 SV=1	NEDD8_DROME (+1)		9 kDa		unknown	1	0	1	0
Elongin B OS=Drosophila melanogaster GN=EloB PE=1 SV=1	O44226_DROME		13 kDa		unknown	1	0	1	0
CG3800, isoform B OS=Drosophila melanogaster GN=CG3800 PE=4 SV=1	A0A0B4JD46_DROME (+1)		18 kDa		unknown	1	0	0	0
Female lethal d, isoform C OS=Drosophila melanogaster GN=fl(2)d PE=4 SV=1	A0A0B4K713_DROME (+1)		45 kDa		unknown	1	0	0	0
H/ACA ribonucleoprotein complex subunit 3 OS=Drosophila melanogaster GN=CG7637 PE=2 SV=1	NOP10_DROME		8 kDa		unknown	1	0	0	0
Ribosomal protein LP1, isoform B OS=Drosophila melanogaster GN=RpLP1 PE=3 SV=1	M9PBK5_DROME (+1)		12 kDa		unknown	1	0	0	0
CG1091, isoform C OS=Drosophila melanogaster GN=Tailor PE=1 SV=1	A0A0B4KGN4_DROME (+2)		64 kDa		unknown	1	0	0	0
Staufen, isoform C OS=Drosophila melanogaster GN=stau PE=1 SV=1	E1JGK6_DROME (+1)		110 kDa		unknown	1	0	0	0
NHP2, isoform B OS=Drosophila melanogaster GN=NHP2 PE=4 SV=1	M9PCI2_DROME (+1)		18 kDa		unknown	1	0	0	0
60S acidic ribosomal protein P0 OS=Drosophila melanogaster GN=RpLP0 PE=3 SV=1	M9PG76_DROME (+1)		34 kDa		unknown	1	0	0	0
FI04781p OS=Drosophila melanogaster GN=Nop56 PE=1 SV=1	Q95WY3_DROME		55 kDa		unknown	1	0	0	0
40S ribosomal protein S12 OS=Drosophila melanogaster GN=RpS12 PE=1 SV=2	RS12_DROME		15 kDa		unknown	1	0	0	0
FI06040p (Fragment) OS=Drosophila melanogaster GN=CG11844-RB PE=2 SV=1	B5RIY3_DROME (+2)		50 kDa		unknown	1	1	2	1
CG7546, isoform D OS=Drosophila melanogaster GN=CG7546 PE=1 SV=1	B7Z0D3_DROME (+3)		144 kDa		unknown	0	0	3	2
AT15141p (Fragment) OS=Drosophila melanogaster GN=Cam-RB PE=2 SV=1	C6SUZ2_DROME (+2)		18 kDa		unknown	1	1	1	0
FI02182p (Fragment) OS=Drosophila melanogaster GN=Yp3-RA PE=2 SV=1	D3DMQ1_DROME (+1)		48 kDa		unknown	0	0	2	0
Glutathione S transferase S1, isoform D OS=Drosophila melanogaster GN=GstS1 PE=1 SV=1	A0A0B4KFT5_DROME (+1)		28 kDa		unknown	0	0	2	1
Serine/threonine-protein phosphatase alpha-1 isoform OS=Drosophila melanogaster GN=Pp1alpha-96A PE=1 SV=1	PP11_DROME		37 kDa		unknown	0	0	1	0
CG5726 OS=Drosophila melanogaster GN=CG5726 PE=1 SV=1	Q7JRH5_DROME		87 kDa		unknown	0	0	3	0
mRNA cap guanine-N7 methyltransferase OS=Drosophila melanogaster GN=l(2)35Bd PE=1 SV=2	MCES_DROME		49 kDa		unknown	0	0	2	0
LD24793p OS=Drosophila melanogaster GN=Ref1 PE=1 SV=1	Q9V3E7_DROME		28 kDa		unknown	0	0	1	0
Probable small nuclear ribonucleoprotein Sm D1 OS=Drosophila melanogaster GN=SmD1 PE=1 SV=1	SMD1_DROME		14 kDa		unknown	0	0	2	0
AT31531p OS=Drosophila melanogaster GN=Liprin-beta PE=1 SV=1	Q9VU88_DROME		76 kDa		unknown	0	0	1	0
CG13277 (Fragment) OS=Drosophila melanogaster GN=CG13277 PE=4 SV=1	B1PFP9_DROME (+6)		11 kDa		unknown	0	0	1	0
Serine/threonine-protein phosphatase PP2A 65 kDa regulatory subunit OS=Drosophila melanogaster GN=Pp2A-29B PE=2 SV=4	2AAA_DROME (+3)		65 kDa		unknown	0	0	3	0
Glycogen synthase, isoform D OS=Drosophila melanogaster GN=GlyS PE=1 SV=1	A0A0B4KHJ5_DROME (+1)		79 kDa		unknown	0	0	1	0
CG9344 OS=Drosophila melanogaster GN=CG9344 PE=1 SV=1	Q9W2P5_DROME		9 kDa		unknown	0	0	1	0
La protein homolog OS=Drosophila melanogaster GN=La PE=1 SV=2	LA_DROME (+1)		45 kDa		unknown	0	0	1	0
RH72463p (Fragment) OS=Drosophila melanogaster GN=RpL14 PE=2 SV=1	Q5BIL1_DROME (+2)		20 kDa		unknown	0	0	1	0
IP21873p OS=Drosophila melanogaster GN=Eip63F-1-RA PE=2 SV=1	C6SUU8_DROME (+1)		22 kDa		unknown	0	0	1	0
40S ribosomal protein S28 OS=Drosophila melanogaster GN=RpS28b PE=1 SV=2	RS28_DROME (+1)		7 kDa		unknown	0	0	1	0
RE57391p OS=Drosophila melanogaster GN=yip6 PE=2 SV=1	Q6NL81_DROME (+2)		16 kDa		unknown	0	0	2	0
SD14463p OS=Drosophila melanogaster GN=glo PE=2 SV=1	Q8IG99_DROME (+1)		36 kDa		unknown	0	0	1	0
Casein kinase IIalpha, isoform C OS=Drosophila melanogaster GN=CkIIalpha PE=1 SV=1	A4V2B8_DROME (+1)		40 kDa		unknown	0	0	1	0
T-complex protein 1 subunit gamma OS=Drosophila melanogaster GN=Cctgamma PE=1 SV=1	A4V303_DROME (+1)		59 kDa		unknown	0	0	1	0
RE71055p OS=Drosophila melanogaster GN=Pez-RA PE=2 SV=1	B9EQW0_DROME (+1)		70 kDa		unknown	0	0	1	0
CAD protein OS=Drosophila melanogaster GN=r PE=1 SV=3	PYR1_DROME (+2)		247 kDa		unknown	0	0	1	0
IP15855p OS=Drosophila melanogaster PE=2 SV=1	Q1EBX5_DROME (+1)		26 kDa		unknown	0	0	1	0
Ribosomal protein L6, isoform A OS=Drosophila melanogaster GN=RpL6 PE=1 SV=1	Q9V9W2_DROME (+1)		28 kDa		unknown	0	0	1	0
SD02215p OS=Drosophila melanogaster GN=mdy PE=1 SV=3	Q9VJH2_DROME		122 kDa		unknown	0	0	1	0
60S ribosomal protein L7 OS=Drosophila melanogaster GN=RpL7 PE=1 SV=2	RL7_DROME (+1)		30 kDa		unknown	0	0	1	0
HDC16773 OS=Drosophila melanogaster GN=HDC16773 PE=4 SV=1	Q6IIW5_DROME		21 kDa		unknown	0	0	1	0
MIP31562p1 OS=Drosophila melanogaster GN=CG45784-RA PE=2 SV=1	A0A0A1EI90_DROME (+1)		241 kDa		unknown	0	5	5	3
