# Supplementary material for: The E2 Marie Kondo and the CTLH E3 ligase clear deposited RNA binding proteins during the maternal-to-zygotic transition
Source: eLife. 2020 Jun 23;9:e53889. doi: 10.7554/eLife.53889 (PMC7384856; doi:10.7554/eLife.53889)
Supplement: Figure 4—source data 2. [file elife-53889-fig4-data2.xlsx]

## Sheet: Sheet1
Figure 4-Source table 2. Cup immunoprecipitation/mass spectrometry results
Identified Proteins (297)	Accession Number	Molecular Weight	Protein Grouping Ambiguity	Taxonomy	GFP 0-1 hr	IgG 0-1 hr	GFP 2-3 hr	IgG 2-3 hr
Protein cup OS=Drosophila melanogaster GN=cup PE=1 SV=3	Q9VMA3 (+1)	126 kDa		unknown	261	41	251	10
Cluster of Trailer hitch, isoform C OS=Drosophila melanogaster GN=tral PE=1 SV=1 (M9PF14)	M9PF14 [6]	70 kDa	TRUE	unknown	327	181	297	75
Putative ATP-dependent RNA helicase me31b OS=Drosophila melanogaster GN=me31B PE=1 SV=3	P23128	52 kDa		unknown	150	28	41	5
Polyadenylate-binding protein OS=Drosophila melanogaster GN=pAbp PE=1 SV=3	P21187	70 kDa		unknown	101	40	60	22
Pyruvate kinase OS=Drosophila melanogaster GN=PyK PE=2 SV=2	O62619 (+1)	57 kDa		unknown	64	58	46	26
Cluster of Heat shock protein cognate 4, isoform G OS=Drosophila melanogaster GN=Hsc70-4 PE=1 SV=1 (C7LA75)	C7LA75 [14]	71 kDa	TRUE	unknown	87	32	64	4
Cluster of Eukaryotic initiation factor 4E, isoform H OS=Drosophila melanogaster GN=eIF4E1 PE=1 SV=1 (M9PBZ9)	M9PBZ9 [3]	29 kDa	TRUE	unknown	56	12	35	0
RH35990p (Fragment) OS=Drosophila melanogaster GN=lost PE=2 SV=1	Q8IGE9 (+1)	59 kDa		unknown	63	17	28	3
LD32873p OS=Drosophila melanogaster GN=mahe PE=1 SV=1	Q9W3M7	100 kDa	TRUE	unknown	40	38	25	9
GH10652p OS=Drosophila melanogaster GN=BcDNA:HL01868 PE=1 SV=1	Q8MZI3	88 kDa	TRUE	unknown	33	32	21	20
GH13725p OS=Drosophila melanogaster GN=CCT6 PE=1 SV=1	Q9VXQ5	58 kDa		unknown	33	29	18	17
LD37574p OS=Drosophila melanogaster GN=yps PE=1 SV=1	Q95RE4	38 kDa		unknown	35	18	29	4
Ribosomal protein S19a, isoform C OS=Drosophila melanogaster GN=RpS19a PE=1 SV=1	E2QD65 (+1)	17 kDa		unknown	22	20	26	15
Tubulin alpha chain (Fragment) OS=Drosophila melanogaster PE=2 SV=1	K7WKV5 (+5)	46 kDa		unknown	28	25	24	10
40S ribosomal protein S3a OS=Drosophila melanogaster GN=RpS3A PE=1 SV=4	P55830	30 kDa		unknown	24	22	20	6
40S ribosomal protein S18 OS=Drosophila melanogaster GN=RpS18 PE=1 SV=1	P41094	18 kDa		unknown	17	16	14	0
Fmr1, isoform G OS=Drosophila melanogaster GN=Fmr1 PE=1 SV=1	A0A0B4K618 (+3)	81 kDa		unknown	25	22	5	3
MIP05689p (Fragment) OS=Drosophila melanogaster GN=Nop60B-RC PE=2 SV=1	C0P8M5 (+3)	60 kDa		unknown	20	17	11	7
FI02182p (Fragment) OS=Drosophila melanogaster GN=Yp3-RA PE=2 SV=1	D3DMQ1 (+2)	48 kDa		unknown	19	13	12	9
T-complex protein 1 subunit delta OS=Drosophila melanogaster GN=CCT4 PE=1 SV=1	Q9VK69	57 kDa		unknown	19	14	13	4
Heat shock protein 83, isoform B OS=Drosophila melanogaster GN=Hsp83 PE=3 SV=1	M9PBL3 (+1)	82 kDa		unknown	17	6	18	8
T-complex protein 1 subunit gamma OS=Drosophila melanogaster GN=CCT3 PE=1 SV=1	A4V303 (+1)	59 kDa		unknown	16	10	12	7
Elongation factor 1-alpha OS=Drosophila melanogaster GN=eEF1alpha1 PE=1 SV=1	C6TP87 (+1)	50 kDa		unknown	14	9	16	7
IGF-II mRNA-binding protein OS=Drosophila melanogaster GN=Imp PE=1 SV=2	Q9VZ69	62 kDa		unknown	27	2	19	0
TA01815p OS=Drosophila melanogaster GN=Yp2-RA PE=2 SV=1	B5RJK7 (+2)	52 kDa	TRUE	unknown	15	11	14	7
FI21269p1 OS=Drosophila melanogaster GN=muskelin PE=2 SV=1	Q0E9A5 (+1)	98 kDa		unknown	34	0	5	0
Tcp1-like, isoform B OS=Drosophila melanogaster GN=CCT1 PE=1 SV=1	A4V391 (+1)	60 kDa		unknown	21	8	7	3
GEO07301p1 OS=Drosophila melanogaster GN=RpS15 PE=1 SV=1	Q7JZW2	17 kDa		unknown	13	12	7	2
GEO08239p1 OS=Drosophila melanogaster GN=RpS16 PE=2 SV=1	A0A0B4LG52	17 kDa		unknown	16	11	8	1
CG7033 OS=Drosophila melanogaster GN=CCT2 PE=1 SV=2	Q9W392	58 kDa		unknown	15	4	12	4
Ribosomal protein S3, isoform B OS=Drosophila melanogaster GN=RpS3 PE=1 SV=1	G3M3A2 (+1)	27 kDa		unknown	18	10	4	2
GEO13284p1 (Fragment) OS=Drosophila melanogaster PE=2 SV=1	A0A1B2AJL4 (+3)	18 kDa		unknown	10	9	9	3
CG8258 OS=Drosophila melanogaster GN=CCT8 PE=1 SV=1	Q7K3J0	59 kDa		unknown	19	9	8	0
LD40493p OS=Drosophila melanogaster GN=TFAM PE=1 SV=1	Q9VDL2	30 kDa		unknown	12	9	11	3
CG5787, isoform A OS=Drosophila melanogaster GN=CG5787 PE=1 SV=2	Q9VK59	100 kDa		unknown	18	0	14	0
Vitellogenin-1 OS=Drosophila melanogaster GN=Yp1 PE=1 SV=1	P02843 (+2)	49 kDa	TRUE	unknown	12	10	9	8
Cluster of Ran-binding protein M, isoform E OS=Drosophila melanogaster GN=RanBPM PE=1 SV=1 (A0A0B4K851)	A0A0B4K851 [7]	107 kDa	TRUE	unknown	26	0	8	0
CG8963, isoform E OS=Drosophila melanogaster GN=CG8963 PE=1 SV=1	A0A0B4K891 (+1)	58 kDa		unknown	16	12	4	0
Zinc-finger protein at 72D, isoform B OS=Drosophila melanogaster GN=Zn72D PE=1 SV=1	Q86BI3	96 kDa		unknown	15	7	9	0
Ribosomal protein S7, isoform E OS=Drosophila melanogaster GN=RpS7 PE=1 SV=2	Q8IMI7 (+1)	22 kDa		unknown	13	11	4	0
Eukaryotic translation initiation factor 3 subunit A OS=Drosophila melanogaster GN=eIF3-S10 PE=1 SV=1	Q9VN25 (+1)	134 kDa		unknown	13	10	5	0
RE23444p (Fragment) OS=Drosophila melanogaster GN=Rbp2-RB PE=2 SV=1	E8NH88 (+4)	35 kDa		unknown	12	10	4	3
Eukaryotic translation initiation factor 4G, isoform B OS=Drosophila melanogaster GN=eIF4G1 PE=1 SV=1	A8DZ29 (+1)	211 kDa		unknown	12	3	7	6
Ribosomal protein S2, isoform B OS=Drosophila melanogaster GN=RpS2 PE=3 SV=1	M9PB84 (+1)	29 kDa		unknown	10	5	9	3
40S ribosomal protein SA OS=Drosophila melanogaster GN=sta PE=1 SV=2	P38979 (+2)	35 kDa		unknown	14	5	7	2
RH14172p (Fragment) OS=Drosophila melanogaster GN=RpS10b-RB PE=2 SV=1	B7ZWP7 (+4)	21 kDa		unknown	12	6	4	2
Protein Smaug OS=Drosophila melanogaster GN=smg PE=1 SV=2	Q23972	109 kDa		unknown	14	0	7	3
LD13662p OS=Drosophila melanogaster GN=RpS9 PE=1 SV=1	C6SUW3 (+1)	23 kDa		unknown	12	7	4	0
Heterogeneous nuclear ribonucleoprotein at 27C, isoform D OS=Drosophila melanogaster GN=Hrb27C PE=1 SV=1	E1JHA4 (+2)	45 kDa		unknown	11	8	6	0
Importin subunit alpha OS=Drosophila melanogaster GN=Pen PE=1 SV=2	P52295	58 kDa		unknown	17	4	3	1
Interleukin enhancer-binding factor 2 homolog OS=Drosophila melanogaster GN=CG5641 PE=2 SV=1	Q9VG73	44 kDa		unknown	12	6	6	1
40S ribosomal protein S4 OS=Drosophila melanogaster GN=RpS4 PE=1 SV=2	P41042 (+1)	29 kDa		unknown	13	5	5	1
40S ribosomal protein S27 OS=Drosophila melanogaster GN=RpS27 PE=1 SV=1	Q9VBU9	9 kDa		unknown	7	6	8	3
GEO10165p1 (Fragment) OS=Drosophila melanogaster PE=2 SV=1	A0A1B2AJ64 (+1)	12 kDa		unknown	7	5	6	4
Histone H4 OS=Drosophila melanogaster GN=His4r PE=3 SV=1	A0A0B4KFZ9 (+1)	11 kDa		unknown	9	8	5	0
Supernumerary limbs, isoform B OS=Drosophila melanogaster GN=slmb PE=4 SV=1	A0A0B4KHK1 (+1)	69 kDa		unknown	18	0	2	0
LD47396p OS=Drosophila melanogaster GN=CCT7 PE=1 SV=2	Q9VHL2	59 kDa		unknown	11	4	4	1
RE25356p OS=Drosophila melanogaster PE=2 SV=1	D5AEL0 (+3)	78 kDa		unknown	8	4	5	0
RE03648p1 OS=Drosophila melanogaster GN=wisp PE=2 SV=1	L7XBB9 (+2)	151 kDa		unknown	8	3	6	0
RNA-binding protein lark OS=Drosophila melanogaster GN=lark PE=1 SV=1	Q94901	40 kDa		unknown	11	2	6	0
Receptor of activated protein kinase C 1, isoform C OS=Drosophila melanogaster GN=Rack1 PE=4 SV=1	M9PCC1 (+1)	36 kDa		unknown	12	4	2	0
60S acidic ribosomal protein P0 OS=Drosophila melanogaster GN=RpLP0 PE=3 SV=1	M9PG76 (+1)	34 kDa		unknown	9	4	5	0
CG6617 OS=Drosophila melanogaster GN=CG6617 PE=1 SV=1	Q9VWS1	26 kDa		unknown	11	0	7	0
40S ribosomal protein S8 OS=Drosophila melanogaster GN=RpS8 PE=3 SV=1	A0A0B4K6N1 (+1)	24 kDa		unknown	10	2	3	1
Female-specific independent of transformer OS=Drosophila melanogaster GN=fit PE=1 SV=1	Q9VD66	14 kDa		unknown	7	5	4	1
NAT1, isoform D OS=Drosophila melanogaster GN=NAT1 PE=1 SV=1	A1Z968 (+1)	163 kDa		unknown	8	3	5	0
TA01224p (Fragment) OS=Drosophila melanogaster GN=RpS6-RB PE=2 SV=1	D2NUH9 (+2)	31 kDa		unknown	7	3	4	0
Pabp2, isoform B OS=Drosophila melanogaster GN=Pabp2 PE=1 SV=1	E2QC83 (+1)	25 kDa		unknown	7	5	1	0
GEO01111p1 OS=Drosophila melanogaster GN=SkpA PE=1 SV=1	O77430	19 kDa		unknown	6	4	4	0
60S ribosomal protein L4 OS=Drosophila melanogaster GN=RpL4 PE=1 SV=2	P09180	45 kDa		unknown	8	2	4	1
LD35157p OS=Drosophila melanogaster GN=CG13638 PE=1 SV=1	Q8MSB1	45 kDa		unknown	10	0	4	0
Jabba, isoform H OS=Drosophila melanogaster GN=Jabba PE=1 SV=1	A0A0B4KFV2 (+1)	43 kDa		unknown	5	4	2	1
GEO07866p1 OS=Drosophila melanogaster GN=RpS15Aa PE=1 SV=1	E1JJM9 (+1)	15 kDa		unknown	7	4	3	0
RE07395p OS=Drosophila melanogaster GN=CG3641 PE=2 SV=1	Q8SZC1 (+1)	39 kDa		unknown	4	2	7	1
Gustavus, isoform G OS=Drosophila melanogaster GN=gus PE=4 SV=1	A0A0B4K6X3 (+1)	32 kDa		unknown	6	2	4	0
LD09503p OS=Drosophila melanogaster GN=CG4877 PE=2 SV=1	Q95RV6 (+1)	132 kDa		unknown	4	3	5	1
La related protein, isoform G OS=Drosophila melanogaster GN=larp PE=1 SV=1	A0A0B4K7Y7 (+1)	178 kDa		unknown	6	0	5	0
Cluster of Histone H2A OS=Drosophila melanogaster GN=His2A PE=1 SV=2 (P84051)	P84051 [4]	13 kDa	TRUE	unknown	6	5	1	0
B52, isoform O OS=Drosophila melanogaster GN=B52 PE=4 SV=1	A0A0C4DHG5 (+4)	40 kDa		unknown	7	1	1	0
Tubulin gamma chain OS=Drosophila melanogaster GN=gammaTub37C PE=3 SV=1	M9PDN9 (+1)	51 kDa		unknown	6	2	3	0
RE33426p OS=Drosophila melanogaster GN=Nop56 PE=2 SV=1	Q8IGT5 (+1)	55 kDa		unknown	6	4	1	0
LD40489p OS=Drosophila melanogaster GN=SF2 PE=1 SV=1	Q9V3W7	28 kDa		unknown	8	1	1	0
FI21236p1 OS=Drosophila melanogaster GN=rump PE=1 SV=1	Q9VHC7	67 kDa		unknown	8	0	2	0
Pacman, isoform B OS=Drosophila melanogaster GN=pcm PE=1 SV=1	E1JJR3 (+1)	185 kDa	TRUE	unknown	5	4	1	0
Ribosomal protein L10, isoform E OS=Drosophila melanogaster GN=RpL10 PE=4 SV=1	M9PIM0 (+1)	26 kDa		unknown	5	2	3	0
60S ribosomal protein L22 OS=Drosophila melanogaster GN=RpL22 PE=1 SV=2	P50887	31 kDa		unknown	3	0	7	0
GEO07404p1 (Fragment) OS=Drosophila melanogaster PE=2 SV=1	A0A1B3Q3N5 (+1)	13 kDa		unknown	4	2	2	0
MIP33436p1 OS=Drosophila melanogaster GN=Pp2A-29B PE=1 SV=1	H5V8B8 (+3)	72 kDa		unknown	7	0	1	0
Shuttle craft, isoform D OS=Drosophila melanogaster GN=stc PE=4 SV=1	M9PD57 (+3)	123 kDa		unknown	5	0	3	0
Nucleoporin 358kD, isoform B OS=Drosophila melanogaster GN=Nup358 PE=1 SV=1	A0A0B4K7J2 (+2)	299 kDa		unknown	3	0	4	1
Female sterile (2) ketel, isoform B OS=Drosophila melanogaster GN=Fs(2)Ket PE=4 SV=1	M9NDC3 (+1)	99 kDa		unknown	6	1	1	0
Eukaryotic translation initiation factor 3 subunit I OS=Drosophila melanogaster GN=Trip1 PE=1 SV=1	O02195	36 kDa		unknown	3	2	3	0
CAD protein OS=Drosophila melanogaster GN=r PE=1 SV=3	P05990 (+1)	247 kDa		unknown	4	1	3	0
40S ribosomal protein S12 OS=Drosophila melanogaster GN=RpS12 PE=1 SV=2	P80455	15 kDa		unknown	5	0	3	0
Elongin C, isoform A OS=Drosophila melanogaster GN=EloC PE=1 SV=1	Q7JWD6	13 kDa		unknown	3	1	3	0
AT09839p (Fragment) OS=Drosophila melanogaster GN=14-3-3epsilon-RD PE=2 SV=1	D3DMY5	30 kDa	TRUE	unknown	7	1	1	0
Elongin B OS=Drosophila melanogaster GN=EloB PE=1 SV=1	O44226	13 kDa		unknown	2	1	4	0
Actin-42A OS=Drosophila melanogaster GN=Act42A PE=1 SV=3	P02572 (+2)	42 kDa		unknown	4	0	3	0
Ubiquitin-40S ribosomal protein S27a OS=Drosophila melanogaster GN=RpS27A PE=1 SV=2	P15357 (+1)	18 kDa		unknown	4	0	2	0
60S ribosomal protein L19 OS=Drosophila melanogaster GN=RpL19 PE=1 SV=2	P36241	24 kDa		unknown	5	0	2	0
FI01658p OS=Drosophila melanogaster GN=RpL23A PE=1 SV=1	Q9W0A8	29 kDa		unknown	1	0	5	1
40S ribosomal protein S26 OS=Drosophila melanogaster GN=RpS26 PE=3 SV=1	M9PG47 (+1)	13 kDa		unknown	2	0	4	0
60S ribosomal protein L7a OS=Drosophila melanogaster GN=RpL7A PE=1 SV=2	P46223 (+1)	31 kDa		unknown	2	0	3	1
LP06614p (Fragment) OS=Drosophila melanogaster GN=RpLP2-RB PE=2 SV=1	B7FNN6 (+1)	14 kDa		unknown	3	1	3	0
Heat shock protein 26 OS=Drosophila melanogaster GN=Hsp26 PE=1 SV=2	P02517 (+1)	23 kDa		unknown	2	0	3	1
60S ribosomal protein L8 OS=Drosophila melanogaster GN=RpL8 PE=1 SV=1	Q9V3G1	28 kDa		unknown	2	0	3	1
T-complex chaperonin 5, isoform B OS=Drosophila melanogaster GN=CCT5 PE=1 SV=1	A1Z8U4 (+2)	56 kDa		unknown	3	0	2	0
Probable isocitrate dehydrogenase [NAD] subunit alpha, mitochondrial OS=Drosophila melanogaster GN=l(1)G0156 PE=2 SV=1	Q9VWH4 (+1)	41 kDa		unknown	2	0	3	0
GM24606p (Fragment) OS=Drosophila melanogaster GN=oho23B-RE PE=2 SV=1	E4NKJ9 (+3)	11 kDa		unknown	2	1	2	0
AT04852p OS=Drosophila melanogaster GN=eIF-4a-RD PE=2 SV=1	C8VV33 (+3)	44 kDa		unknown	3	0	1	0
Elongation factor 2 OS=Drosophila melanogaster GN=EF2 PE=1 SV=4	P13060	94 kDa		unknown	3	0	1	0
GH04763p (Fragment) OS=Drosophila melanogaster GN=CG11183 PE=2 SV=1	Q52KA4 (+1)	43 kDa		unknown	3	0	1	0
60S ribosomal protein L27 OS=Drosophila melanogaster GN=RpL27 PE=1 SV=1	Q9VBN5	16 kDa		unknown	3	0	1	0
Argonaute-2 (Fragment) OS=Drosophila melanogaster GN=Ago2 PE=2 SV=1	A0A1B1LJP5 (+2)	49 kDa	TRUE	unknown	2	0	2	0
CG5746, isoform E OS=Drosophila melanogaster GN=CG5746 PE=4 SV=1	A0A0B4KHD9 (+5)	46 kDa		unknown	1	0	3	0
Ribosomal protein L11, isoform B OS=Drosophila melanogaster GN=RpL11 PE=1 SV=1	A0A0B4LGZ5 (+1)	21 kDa		unknown	2	1	1	0
Ribosomal protein L18, isoform B OS=Drosophila melanogaster GN=RpL18 PE=4 SV=1	M9PHM6 (+1)	22 kDa		unknown	2	1	1	0
Heat shock protein 27 OS=Drosophila melanogaster GN=Hsp27 PE=1 SV=2	P02518 (+1)	24 kDa		unknown	2	1	1	0
LD21074p OS=Drosophila melanogaster GN=Pdcd4 PE=1 SV=2	Q9VY91	56 kDa		unknown	2	1	1	0
Small ribonucleoprotein particle U1 subunit 70K, isoform C OS=Drosophila melanogaster GN=snRNP-U1-70K PE=4 SV=1	M9PC89 (+1)	53 kDa		unknown	2	0	1	0
									#DIV/0!
