# Supplementary material for: The E2 Marie Kondo and the CTLH E3 ligase clear deposited RNA binding proteins during the maternal-to-zygotic transition
Source: eLife. 2020 Jun 23;9:e53889. doi: 10.7554/eLife.53889 (PMC7384856; doi:10.7554/eLife.53889)
Supplement: Figure 5—source data 1. [file elife-53889-fig5-data1.xlsx]

## Sheet: Sheet1
Figure 5-Source Table 1. Results of Gid5 Phyre2 Search Against the Human and Drosophila Genome.
Rank	Result	Genome	Gid5 Region	Search Region	Confidence	%I.d
1	gi|32526896|ref|NP_056211.2| armadillo repeat containing 8 isoform 2	Homo sapiens	271-784	224-657	100	23
2	gi|6912678|ref|NP_036575.1| sperm associated antigen 6 isoform 1	Homo sapiens	335-784	5-407	99.9	15
3	gi|113427187|ref|XP_001133262.1| PREDICTED: similar to Importin alpha-2 subunit (Karyopherin alpha-2 subunit) (SRP1-alpha) (RAG cohort protein 1) isoform 5	Homo sapiens	301-784	65-447	99.9	14
4	gi|113427181|ref|XP_001133267.1| PREDICTED: similar to Importin alpha-2 subunit (Karyopherin alpha-2 subunit) (SRP1-alpha) (RAG cohort protein 1) isoform 7	Homo sapiens	306-784	70-447	99.9	14
5	gi|113427183|ref|XP_001133271.1| PREDICTED: similar to Importin alpha-2 subunit (Karyopherin alpha-2 subunit) (SRP1-alpha) (RAG cohort protein 1) isoform 8	Homo sapiens	306-784	70-447	99.9	14
6	gi|4504897|ref|NP_002257.1| karyopherin alpha 2	Homo sapiens	306-784	70-447	99.9	14
7	gi|113427177|ref|XP_001133258.1| PREDICTED: similar to Importin alpha-2 subunit (Karyopherin alpha-2 subunit) (SRP1-alpha) (RAG cohort protein 1) isoform 4	Homo sapiens	306-784	70-447	99.9	14
8	gi|113427173|ref|XP_001133254.1| PREDICTED: similar to Importin alpha-2 subunit (Karyopherin alpha-2 subunit) (SRP1-alpha) (RAG cohort protein 1) isoform 2	Homo sapiens	306-784	70-447	99.9	14
9	gi|113427175|ref|XP_001133256.1| PREDICTED: similar to Importin alpha-2 subunit (Karyopherin alpha-2 subunit) (SRP1-alpha) (RAG cohort protein 1) isoform 3	Homo sapiens	306-784	70-447	99.9	14
10	gi|113427179|ref|XP_001133265.1| PREDICTED: similar to Importin alpha-2 subunit (Karyopherin alpha-2 subunit) (SRP1-alpha) (RAG cohort protein 1) isoform 6	Homo sapiens	306-784	70-447	99.9	14
11	gi|113427185|ref|XP_001133253.1| PREDICTED: similar to Importin alpha-2 subunit (Karyopherin alpha-2 subunit) (SRP1-alpha) (RAG cohort protein 1) isoform 1	Homo sapiens	331-784	63-421	99.9	14
12	gi|17737655|ref|NP_524167.1| CG8548-PA	Drosophila melanogaster	331-784	107-461	99.9	16
13	gi|6912478|ref|NP_036448.1| karyopherin alpha 6	Homo sapiens	306-784	74-448	99.9	17
14	gi|24645427|ref|NP_731378.1| CG9423-PB, isoform B	Drosophila melanogaster	331-784	79-433	99.9	16
15	gi|28573147|ref|NP_788614.1| CG9423-PC, isoform C	Drosophila melanogaster	331-784	79-433	99.9	16
16	gi|24645425|ref|NP_731377.1| CG9423-PA, isoform A	Drosophila melanogaster	331-784	79-433	99.9	16
17	gi|17136998|ref|NP_477041.1| CG4799-PA	Drosophila melanogaster	309-784	66-437	99.9	13
18	gi|39812229|ref|NP_002260.2| karyopherin alpha 5 (importin alpha 6)	Homo sapiens	331-784	96-451	99.9	16
19	gi|27262641|ref|NP_758442.1| sperm associated antigen 6 isoform 2	Homo sapiens	330-784	10-363	99.9	13
20	gi|88758611|ref|NP_002255.2| karyopherin alpha 1	Homo sapiens	331-784	95-450	99.9	17
21	gi|34485722|ref|NP_002258.2| karyopherin alpha 3	Homo sapiens	314-784	73-438	99.9	14
22	gi|24658920|ref|NP_648007.1| CG10478-PA	Drosophila melanogaster	335-784	36-385	99.9	19
23	gi|4504901|ref|NP_002259.1| karyopherin alpha 4	Homo sapiens	314-784	73-438	99.9	15
24	gi|24582487|ref|NP_609111.1| CG5155-PA	Drosophila melanogaster	273-787	254-655	99.9	13
25	gi|31657114|ref|NP_060546.2| armadillo repeat containing 4	Homo sapiens	273-787	636-1034	99.9	16
26	gi|113414953|ref|XP_001133673.1| PREDICTED: similar to Beta-catenin	Homo sapiens	308-783	127-515	99.9	16
27	gi|27436879|ref|NP_775104.1| armadillo repeat containing 3	Homo sapiens	240-784	80-507	99.9	16
28	gi|94536840|ref|NP_060972.3| transmembrane and coiled-coil domains 6	Homo sapiens	389-789	85-452	99.9	17
29	gi|113414951|ref|XP_001133675.1| PREDICTED: similar to catenin (cadherin-associated protein), beta 1, 88kDa	Homo sapiens	289-783	106-515	99.9	15
30	gi|4503131|ref|NP_001895.1| catenin (cadherin-associated protein), beta 1, 88kDa	Homo sapiens	289-783	106-515	99.9	15
31	gi|113414955|ref|XP_001133660.1| PREDICTED: similar to catenin (cadherin-associated protein), beta 1, 88kDa	Homo sapiens	309-783	121-508	99.9	16
32	gi|113414957|ref|XP_001133664.1| PREDICTED: similar to catenin (cadherin-associated protein), beta 1, 88kDa	Homo sapiens	314-784	66-430	99.9	16
33	gi|20070314|ref|NP_066982.2| RAP1, GTP-GDP dissociation stimulator 1	Homo sapiens	273-780	94-556	99.8	18
34	gi|91206450|ref|NP_653309.2| ankyrin and armadillo repeat containing	Homo sapiens	397-784	656-947	99.8	14
35	gi|4504811|ref|NP_002221.1| junction plakoglobin	Homo sapiens	314-783	144-506	99.8	17
36	gi|12056468|ref|NP_068831.1| junction plakoglobin	Homo sapiens	314-783	144-506	99.8	17
37	gi|24639204|ref|NP_476665.2| CG11579-PD, isoform D	Drosophila melanogaster	314-783	161-523	99.8	15
38	gi|19549863|ref|NP_599100.1| CG11579-PB, isoform B	Drosophila melanogaster	314-783	161-523	99.8	15
39	gi|45553932|ref|NP_996328.1| CG11579-PE, isoform E	Drosophila melanogaster	314-783	161-523	99.8	15
40	gi|17136376|ref|NP_476666.1| CG11579-PA, isoform A	Drosophila melanogaster	314-783	161-523	99.8	15
41	gi|45551205|ref|NP_726775.2| CG11579-PC, isoform C	Drosophila melanogaster	456-784	172-435	99.8	16
42	gi|15529984|ref|NP_219483.1| armadillo repeat containing 6	Homo sapiens	364-781	109-454	99.8	11
43	gi|19922518|ref|NP_611306.1| CG5721-PA	Drosophila melanogaster	332-781	61-441	99.8	15
44	gi|89064523|ref|XP_947552.1| PREDICTED: similar to plakophilin 1 isoform 1a	Homo sapiens	456-784	136-479	99.8	16
45	gi|53729344|ref|NP_001005337.1| plakophilin 1 isoform 1a	Homo sapiens	456-784	258-601	99.8	16
46	gi|47458043|ref|NP_998819.1| armadillo repeat containing 8 isoform 3	Homo sapiens	511-784	14-249	99.7	16
47	gi|47458045|ref|NP_054873.2| armadillo repeat containing 8 isoform 1	Homo sapiens	511-784	14-249	99.7	16
48	gi|89027657|ref|XP_940733.1| PREDICTED: similar to Importin alpha-2 subunit (Karyopherin alpha-2 subunit) (SRP1-alpha) (RAG cohort protein 1)	Homo sapiens	509-783	99-332	99.7	12
49	gi|89026541|ref|XP_941941.1| PREDICTED: similar to Importin alpha-2 subunit (Karyopherin alpha-2 subunit) (SRP1-alpha) (RAG cohort protein 1)	Homo sapiens	509-783	99-332	99.7	12
50	gi|89025535|ref|XP_931736.1| PREDICTED: similar to Importin alpha-2 subunit (Karyopherin alpha-2 subunit) (SRP1-alpha) (RAG cohort protein 1)	Homo sapiens	509-783	99-332	99.7	12
51	gi|17137458|ref|NP_477305.1| CG3572-PB, isoform B	Drosophila melanogaster	456-784	55-388	99.7	13
52	gi|28875784|ref|NP_079018.1| armadillo repeat containing 5	Homo sapiens	365-764	107-418	99.7	17
53	gi|45552489|ref|NP_995767.1| CG3572-PC, isoform C	Drosophila melanogaster	456-784	56-389	99.7	12
54	gi|29725607|ref|NP_061141.2| smooth muscle cell associated protein-1 isoform 2	Homo sapiens	359-781	582-928	99.7	14
55	gi|7657530|ref|NP_055248.1| rhabdoid tumor deletion region protein 1	Homo sapiens	456-784	39-299	99.7	15
56	gi|89179321|ref|NP_001034764.1| smooth muscle cell associated protein-1 isoform 3	Homo sapiens	359-781	567-913	99.7	14
57	gi|11034811|ref|NP_001323.1| catenin (cadherin-associated protein), delta 2 (neural plakophilin-related arm-repeat protein)	Homo sapiens	490-784	555-919	99.7	20
58	gi|6005830|ref|NP_009114.1| plakophilin 3	Homo sapiens	456-784	332-682	99.6	16
59	gi|113422685|ref|XP_001129327.1| PREDICTED: similar to Plakophilin-3	Homo sapiens	456-784	332-667	99.6	15
60	gi|52630432|ref|NP_001005242.1| plakophilin 2 isoform 2a	Homo sapiens	455-784	365-712	99.6	17
61	gi|113422887|ref|XP_001126767.1| PREDICTED: similar to catenin (cadherin-associated protein), delta 1	Homo sapiens	391-784	59-500	99.6	20
62	gi|21361407|ref|NP_036399.2| hsp70-interacting protein	Homo sapiens	422-697	120-360	99.6	15
63	gi|53829374|ref|NP_003619.2| plakophilin 4 isoform a	Homo sapiens	456-784	541-899	99.6	17
64	gi|53829376|ref|NP_001005476.1| plakophilin 4 isoform b	Homo sapiens	456-784	541-899	99.6	16
65	gi|113422879|ref|XP_001126721.1| PREDICTED: similar to Catenin delta 1 (p120 catenin) (p120(ctn)) (Cadherin-associated Src substrate) (CAS-) (p120(cas))	Homo sapiens	456-784	86-438	99.6	19
66	gi|10835010|ref|NP_001322.1| catenin (cadherin-associated protein), delta 1	Homo sapiens	456-784	379-731	99.5	17
67	gi|113422881|ref|XP_001126756.1| PREDICTED: similar to Catenin delta 1 (p120 catenin) (p120(ctn)) (Cadherin-associated Src substrate) (CAS-) (p120(cas))	Homo sapiens	490-784	48-414	99.5	20
68	gi|113422883|ref|XP_001126781.1| PREDICTED: similar to Catenin delta 1 (p120 catenin) (p120(ctn)) (Cadherin-associated Src substrate) (CAS-) (p120(cas))	Homo sapiens	456-784	56-408	99.5	19
69	gi|113422889|ref|XP_001126823.1| PREDICTED: similar to Catenin delta 1 (p120 catenin) (p120(ctn)) (Cadherin-associated Src substrate) (CAS-) (p120(cas))	Homo sapiens	456-784	56-408	99.5	19
70	gi|113422885|ref|XP_001126793.1| PREDICTED: similar to Catenin delta 1 (p120 catenin) (p120(ctn)) (Cadherin-associated Src substrate) (CAS-) (p120(cas))	Homo sapiens	456-784	56-414	99.5	19
71	gi|4502247|ref|NP_001661.1| armadillo repeat protein	Homo sapiens	490-784	363-736	99.5	19
72	gi|17864418|ref|NP_524796.1| CG2708-PA	Drosophila melanogaster	377-781	506-914	99.5	14
73	gi|24663438|ref|NP_648594.2| CG10973-PA, isoform A	Drosophila melanogaster	456-739	22-252	99.5	15
74	gi|4758932|ref|NP_004563.1| plakophilin 2 isoform 2b	Homo sapiens	456-784	366-756	99.4	21
75	gi|53729346|ref|NP_000290.2| plakophilin 1 isoform 1b	Homo sapiens	488-784	248-622	99.4	17
76	gi|85725124|ref|NP_001034002.1| CG10973-PB, isoform B	Drosophila melanogaster	456-738	73-301	99.4	17
77	gi|34222279|ref|NP_115507.3| armadillo repeat containing 2	Homo sapiens	333-734	467-830	99.3	16
78	gi|75750484|ref|NP_001028748.1| cardiomyopathy associated 4 isoform 2	Homo sapiens	379-789	503-921	99.2	12
79	gi|18105054|ref|NP_055785.2| kinesin-associated protein 3	Homo sapiens	385-789	277-665	99.2	13
80	gi|21361399|ref|NP_055040.2| alpha isoform of regulatory subunit A, protein phosphatase 2	Homo sapiens	273-786	208-588	99.1	14
81	gi|27477061|ref|NP_775259.1| cardiomyopathy associated 4 isoform 1	Homo sapiens	359-789	568-923	99.1	13
82	gi|32484979|ref|NP_003655.3| adaptor-related protein complex 3, beta 1 subunit	Homo sapiens	231-778	85-575	99	17
83	gi|19922150|ref|NP_610838.1| CG13326-PA	Drosophila melanogaster	363-770	254-575	99	11
84	gi|17647183|ref|NP_523415.1| CG12532-PA	Drosophila melanogaster	231-777	56-524	99	17
85	gi|14149667|ref|NP_055892.1| sterile alpha and TIR motif containing 1	Homo sapiens	456-784	103-363	99	10
86	gi|21357717|ref|NP_649649.1| CG10286-PA	Drosophila melanogaster	483-780	31-236	99	13
87	gi|41054846|ref|NP_073749.2| armadillo repeat containing, X-linked 5	Homo sapiens	488-777	313-551	99	18
88	gi|17137670|ref|NP_477430.1| CG6193-PA	Drosophila melanogaster	458-789	52-362	98.9	16
89	gi|32455246|ref|NP_002707.3| beta isoform of regulatory subunit A, protein phosphatase 2 isoform a	Homo sapiens	273-784	220-598	98.9	13
90	gi|4557469|ref|NP_001273.1| adaptor-related protein complex 2, beta 1 subunit isoform b	Homo sapiens	231-778	56-524	98.8	14
91	gi|11559929|ref|NP_057212.1| coatomer protein complex, subunit gamma 1	Homo sapiens	236-778	80-529	98.8	14
92	gi|45551446|ref|NP_727512.2| CG11759-PA	Drosophila melanogaster	417-768	542-823	98.8	18
93	gi|34482047|ref|NP_004635.2| adaptor-related protein complex 3, beta 2 subunit	Homo sapiens	231-779	80-581	98.8	15
94	gi|41281996|ref|NP_891552.1| HEAT repeat containing 3	Homo sapiens	483-739	36-260	98.7	19
95	gi|22027653|ref|NP_663782.1| adaptor-related protein complex 1 beta 1 subunit isoform b	Homo sapiens	231-777	56-523	98.7	16
96	gi|32455244|ref|NP_859050.1| beta isoform of regulatory subunit A, protein phosphatase 2 isoform b	Homo sapiens	273-781	220-595	98.7	16
97	gi|89027371|ref|XP_940671.1| PREDICTED: similar to Importin alpha-2 subunit (Karyopherin alpha-2 subunit) (SRP1-alpha) (RAG cohort protein 1)	Homo sapiens	540-783	2-147	98.7	19
98	gi|89025323|ref|XP_933782.1| PREDICTED: similar to Importin alpha-2 subunit (Karyopherin alpha-2 subunit) (SRP1-alpha) (RAG cohort protein 1)	Homo sapiens	540-783	2-147	98.7	19
99	gi|89026213|ref|XP_945175.1| PREDICTED: similar to Importin alpha-2 subunit (Karyopherin alpha-2 subunit) (SRP1-alpha) (RAG cohort protein 1)	Homo sapiens	540-783	2-147	98.7	19
100	gi|7662162|ref|NP_055597.1| ALEX2 protein	Homo sapiens	488-781	389-629	98.7	20
101	gi|29540562|ref|NP_808818.1| ALEX2 protein	Homo sapiens	488-781	389-629	98.7	20
102	gi|83641896|ref|NP_001032722.1| SIL1 protein precursor	Homo sapiens	586-787	201-407	98.6	17
103	gi|11968009|ref|NP_071909.1| SIL1 protein precursor	Homo sapiens	586-787	201-407	98.6	17
104	gi|113408672|ref|XP_001133615.1| PREDICTED: similar to zyg-11 homolog B (C. elegans)-like	Homo sapiens	481-786	462-744	98.6	16
105	gi|78706848|ref|NP_001027227.1| CG17291-PA, isoform A	Drosophila melanogaster	273-786	210-590	98.6	15
106	gi|78706844|ref|NP_001027225.1| CG17291-PC, isoform C	Drosophila melanogaster	273-786	210-590	98.6	15
107	gi|78706846|ref|NP_001027226.1| CG17291-PB, isoform B	Drosophila melanogaster	273-786	210-590	98.6	15
108	gi|31542280|ref|NP_659465.2| hypothetical protein LOC221481	Homo sapiens	488-777	98-336	98.6	21
109	gi|76563908|ref|NP_714921.3| hypothetical protein LOC169436	Homo sapiens	273-662	334-646	98.6	16
110	gi|71773106|ref|NP_001025177.1| adaptor-related protein complex 2, beta 1 subunit isoform a	Homo sapiens	231-778	56-524	98.5	14
111	gi|21356289|ref|NP_651356.1| CG10420-PA	Drosophila melanogaster	570-784	146-373	98.5	17
112	gi|4826730|ref|NP_004949.1| FK506 binding protein 12-rapamycin associated protein 1	Homo sapiens	357-788	407-895	98.5	16
113	gi|5729742|ref|NP_006585.1| adaptor-related protein complex 4, beta 1 subunit	Homo sapiens	231-778	55-516	98.5	15
114	gi|18104996|ref|NP_536806.1| adaptor-related protein complex 1, gamma 2 subunit	Homo sapiens	274-777	143-564	98.5	14
115	gi|4503843|ref|NP_003908.1| adaptor-related protein complex 1, gamma -2 subunit	Homo sapiens	274-777	143-564	98.5	14
116	gi|7706143|ref|NP_057692.1| armadillo repeat containing, X-linked 1	Homo sapiens	488-781	208-450	98.5	23
117	gi|24659272|ref|NP_648038.1| CG8219-PA	Drosophila melanogaster	456-784	116-469	98.4	19
118	gi|71773010|ref|NP_001025178.1| adaptor-related protein complex 1, gamma 1 subunit isoform a	Homo sapiens	274-777	142-566	98.4	18
119	gi|29540564|ref|NP_808816.1| ALEX3 protein	Homo sapiens	488-784	124-369	98.4	19
120	gi|7705274|ref|NP_057691.1| ALEX3 protein	Homo sapiens	488-784	124-369	98.4	19
121	gi|29540566|ref|NP_808817.1| ALEX3 protein	Homo sapiens	488-784	124-369	98.4	19
122	gi|31377663|ref|NP_114111.2| SVH protein	Homo sapiens	488-781	99-340	98.2	22
123	gi|24639687|ref|NP_525071.2| CG11427-PA	Drosophila melanogaster	269-778	188-611	98.2	14
124	gi|71772942|ref|NP_001119.3| adaptor-related protein complex 1, gamma 1 subunit isoform b	Homo sapiens	274-777	142-563	98.2	17
125	gi|22027651|ref|NP_001118.2| adaptor-related protein complex 1 beta 1 subunit isoform a	Homo sapiens	274-777	126-523	98.2	15
126	gi|24651141|ref|NP_651726.1| CG7837-PA	Drosophila melanogaster	437-784	6-315	98.2	13
127	gi|45331213|ref|NP_036548.1| RAN binding protein 6	Homo sapiens	240-784	152-619	98.1	13
128	gi|17864148|ref|NP_524608.1| CG1528-PA, isoform A	Drosophila melanogaster	236-777	81-533	98.1	14
129	gi|50086624|ref|NP_291025.3| integrator complex subunit 4	Homo sapiens	392-784	125-438	98	20
130	gi|24659257|ref|NP_729154.1| CG7398-PB, isoform B	Drosophila melanogaster	456-784	139-511	98	19
131	gi|17137558|ref|NP_477368.1| CG7398-PA, isoform A	Drosophila melanogaster	456-784	139-511	98	19
132	gi|24659264|ref|NP_729155.1| CG7398-PC, isoform C	Drosophila melanogaster	456-784	139-511	98	19
133	gi|42558270|ref|NP_976054.1| hypothetical protein LOC399671	Homo sapiens	489-785	486-744	98	16
134	gi|86990452|ref|NP_001034553.1| hypothetical protein LOC374977	Homo sapiens	481-784	995-1264	98	13
135	gi|24797086|ref|NP_002262.3| RAN binding protein 5	Homo sapiens	240-789	162-634	98	14
136	gi|40018648|ref|NP_003929.3| adaptor-related protein complex 3, delta 1 subunit	Homo sapiens	269-787	183-582	98	13
137	gi|24655224|ref|NP_612112.1| CG12084-PA	Drosophila melanogaster	414-785	392-783	97.9	17
138	gi|17864562|ref|NP_524891.1| CG5092-PA	Drosophila melanogaster	274-788	362-871	97.8	16
139	gi|19923967|ref|NP_612446.1| G protein-coupled receptor associated sorting protein 2	Homo sapiens	488-776	599-837	97.8	16
140	gi|51702248|ref|NP_001004051.1| G protein-coupled receptor associated sorting protein 2	Homo sapiens	488-776	599-837	97.8	16
141	gi|4505541|ref|NP_003706.1| vesicle docking protein p115	Homo sapiens	434-788	18-342	97.8	19
142	gi|24640430|ref|NP_572417.1| CG1422-PA	Drosophila melanogaster	457-788	40-347	97.8	19
143	gi|45552125|ref|NP_788891.2| CG9113-PD, isoform D	Drosophila melanogaster	274-777	183-613	97.8	16
144	gi|55742693|ref|NP_078922.1| zyg-11 homolog B	Homo sapiens	387-786	341-724	97.7	20
145	gi|24651660|ref|NP_733432.1| CG1528-PB, isoform B	Drosophila melanogaster	236-777	85-537	97.7	14
146	gi|13375770|ref|NP_078861.1| armadillo repeat containing 7	Homo sapiens	491-681	17-164	97.6	18
147	gi|38564325|ref|NP_775760.2| hypothetical protein LOC133558	Homo sapiens	459-784	204-1574	97.5	13
148	gi|47578109|ref|NP_689716.2| hypothetical protein LOC140699 isoform 1	Homo sapiens	511-784	776-1027	97.5	12
149	gi|113420243|ref|XP_937130.2| PREDICTED: similar to c11.1 CG12132-PA isoform 5	Homo sapiens	474-787	924-1217	97.5	15
150	gi|24641228|ref|NP_727502.1| CG32668-PA	Drosophila melanogaster	332-727	429-796	97.5	17
151	gi|88948888|ref|XP_946752.1| PREDICTED: similar to Early embryogenesis protein zyg-11	Homo sapiens	387-744	360-702	97.4	14
152	gi|113414573|ref|XP_371655.3| PREDICTED: similar to SVH protein	Homo sapiens	488-777	64-277	97.4	24
153	gi|33589814|ref|NP_006327.2| zyg-11 homolog B (C. elegans)-like	Homo sapiens	414-783	393-753	97.4	21
154	gi|90669931|ref|NP_060338.3| tetratricopeptide repeat domain 12	Homo sapiens	356-769	280-705	97.4	18
155	gi|113420230|ref|XP_931072.2| PREDICTED: hypothetical protein LOC642475	Homo sapiens	511-787	410-671	97.4	11
156	gi|24308123|ref|NP_056505.1| serine/threonine kinase 36 (fused homolog, Drosophila)	Homo sapiens	454-782	848-1177	97.3	16
157	gi|24665422|ref|NP_730184.1| CG32164-PA	Drosophila melanogaster	273-784	126-560	97.3	12
158	gi|39930463|ref|NP_085142.1| basic helix-loop-helix domain containing, class B, 9	Homo sapiens	488-739	326-513	97.3	16
159	gi|24641854|ref|NP_524785.2| CG10986-PB	Drosophila melanogaster	353-784	6-368	97.3	15
160	gi|45552124|ref|NP_788890.2| CG9113-PC, isoform C	Drosophila melanogaster	274-777	170-600	97.3	16
161	gi|45554679|ref|NP_996394.1| CG9113-PE, isoform E	Drosophila melanogaster	274-777	170-600	97.3	16
162	gi|24651728|ref|NP_651887.1| CG2245-PA	Drosophila melanogaster	437-786	5-283	97.2	18
163	gi|46409452|ref|NP_997297.1| hypothetical protein LOC389690	Homo sapiens	481-789	033-1314	97.2	15
164	gi|113420551|ref|XP_942556.2| PREDICTED: hypothetical protein LOC642475	Homo sapiens	511-787	410-683	97.2	13
165	gi|113420238|ref|XP_001126242.1| PREDICTED: similar to c11.1 CG12132-PA	Homo sapiens	474-787	412-1705	97.2	14
166	gi|13775228|ref|NP_112594.1| HEAT-like (PBS lyase) repeat containing 1	Homo sapiens	474-785	28-281	97.1	17
167	gi|45549353|ref|NP_572527.2| CG9113-PA, isoform A	Drosophila melanogaster	278-777	66-594	97.1	14
168	gi|113420564|ref|XP_946410.2| PREDICTED: similar to c11.1 CG12132-PA isoform 11	Homo sapiens	474-787	412-1705	97.1	15
169	gi|48675813|ref|NP_038461.2| transportin 2 (importin 3, karyopherin beta 2b)	Homo sapiens	273-784	258-691	97	17
170	gi|17737759|ref|NP_524226.1| CG1059-PA	Drosophila melanogaster	273-789	132-617	97	13
171	gi|17137782|ref|NP_477496.1| CG2637-PA	Drosophila melanogaster	270-789	180-646	97	11
172	gi|45551439|ref|NP_727311.2| CG9113-PB, isoform B	Drosophila melanogaster	278-777	79-607	97	14
173	gi|28574818|ref|NP_476819.2| CG4260-PA, isoform A	Drosophila melanogaster	278-777	119-580	96.9	14
174	gi|56549668|ref|NP_689854.2| AT rich interactive domain 2 (ARID, RFX-like)	Homo sapiens	516-760	200-456	96.9	17
175	gi|54607053|ref|NP_006827.1| GCN1 general control of amino-acid synthesis 1-like 1	Homo sapiens	415-784	729-2032	96.8	16
176	gi|24646658|ref|NP_650304.1| CG9351-PA, isoform A	Drosophila melanogaster	404-740	242-523	96.7	15
177	gi|24646662|ref|NP_731850.1| CG9351-PC, isoform C	Drosophila melanogaster	404-740	242-523	96.7	15
178	gi|24646660|ref|NP_731849.1| CG9351-PB, isoform B	Drosophila melanogaster	404-740	242-523	96.7	15
179	gi|31563537|ref|NP_056097.1| CLIP-associating protein 1	Homo sapiens	352-784	26-513	96.7	19
180	gi|24581662|ref|NP_608839.1| CG15443-PA	Drosophila melanogaster	537-701	95-230	96.7	16
181	gi|23510379|ref|NP_002261.2| transportin 1	Homo sapiens	274-784	179-694	96.7	16
182	gi|23510381|ref|NP_694858.1| transportin 1	Homo sapiens	274-784	179-694	96.7	16
183	gi|113420249|ref|XP_001126758.1| PREDICTED: similar to brain protein 16	Homo sapiens	487-775	22-329	96.6	14
184	gi|45552169|ref|NP_995607.1| CG4260-PB, isoform B	Drosophila melanogaster	278-777	131-592	96.6	14
185	gi|113413519|ref|XP_291007.5| PREDICTED: similar to c11.1 CG12132-PA	Homo sapiens	463-785	492-1791	96.5	13
186	gi|37675283|ref|NP_031373.2| adaptor-related protein complex 4, epsilon 1 subunit	Homo sapiens	472-784	155-400	96.3	16
187	gi|21355697|ref|NP_650541.1| CG14881-PB, isoform B	Drosophila melanogaster	470-639	2-132	96.3	18
188	gi|24584675|ref|NP_723993.1| CG17332-PD, isoform D	Drosophila melanogaster	456-781	174-435	96.2	21
189	gi|57546906|ref|NP_001009584.1| hypothetical protein LOC54470	Homo sapiens	518-701	133-276	96.1	19
190	gi|34147335|ref|NP_061880.2| hypothetical protein LOC54470	Homo sapiens	518-701	133-276	96.1	19
191	gi|113414314|ref|XP_944799.2| PREDICTED: similar to c11.1 CG12132-PA	Homo sapiens	472-785	508-1817	96.1	13
192	gi|21356909|ref|NP_651468.1| CG6073-PA	Drosophila melanogaster	488-782	5-331	96	19
193	gi|31657117|ref|NP_115949.3| hypothetical protein LOC55671 isoform 1	Homo sapiens	327-740	134-550	96	18
194	gi|7705369|ref|NP_057535.1| coatomer protein complex, subunit beta	Homo sapiens	233-698	67-476	95.9	18
195	gi|24584673|ref|NP_723992.1| CG17332-PB, isoform B	Drosophila melanogaster	402-781	186-509	95.9	19
196	gi|27477041|ref|NP_036437.1| adaptor-related protein complex 2, alpha 2 subunit	Homo sapiens	352-784	78-395	95.9	15
197	gi|24584671|ref|NP_523585.2| CG17332-PA, isoform A	Drosophila melanogaster	456-781	174-435	95.8	21
198	gi|21355603|ref|NP_649847.1| CG11964-PA	Drosophila melanogaster	314-700	167-536	95.8	17
199	gi|62460637|ref|NP_078934.3| importin 4	Homo sapiens	273-787	122-551	95.7	15
200	gi|19923142|ref|NP_002256.2| karyopherin beta 1	Homo sapiens	270-789	174-640	95.7	12
201	gi|53759122|ref|NP_000029.2| adenomatosis polyposis coli	Homo sapiens	537-781	463-726	95.6	18
202	gi|88961381|ref|XP_371617.2| PREDICTED: similar to Cullin-associated NEDD8-dissociated protein 2 (Cullin-associated and neddylation-dissociated protein 2) (p120 CAND2) isoform 1	Homo sapiens	434-784	103-491	95.6	15
203	gi|88968668|ref|XP_945952.1| PREDICTED: similar to Cullin-associated NEDD8-dissociated protein 2 (Cullin-associated and neddylation-dissociated protein 2) (p120 CAND2) isoform 3	Homo sapiens	434-784	103-491	95.6	15
204	gi|5031587|ref|NP_005874.1| adenomatosis polyposis coli 2	Homo sapiens	537-767	428-677	95.6	16
205	gi|113428735|ref|XP_001128038.1| PREDICTED: similar to hsp70-interacting protein	Homo sapiens	590-695	172-272	95.6	16
206	gi|24643213|ref|NP_573371.1| CG8002-PA	Drosophila melanogaster	503-740	21-240	95.5	13
207	gi|10863903|ref|NP_004229.1| thyroid hormone receptor interactor 12	Homo sapiens	484-770	479-706	95.4	17
208	gi|74047534|ref|NP_056083.2| DnaJ (Hsp40) homolog, subfamily C, member 13	Homo sapiens	315-784	396-1882	95.4	18
209	gi|57863301|ref|NP_055912.1| CLIP-associating protein 2	Homo sapiens	612-782	325-512	95.3	19
210	gi|24580567|ref|NP_608498.1| CG4648-PA	Drosophila melanogaster	612-784	733-922	95.2	10
211	gi|61966931|ref|NP_001013761.1| hypothetical protein LOC442578	Homo sapiens	511-643	16-120	95.2	23
212	gi|113426482|ref|XP_001125720.1| PREDICTED: similar to Vac14 homolog	Homo sapiens	359-788	45-429	95.1	18
213	gi|24665414|ref|NP_730182.1| CG32165-PA	Drosophila melanogaster	271-784	83-561	95	13
214	gi|83722282|ref|NP_940980.2| leucine-rich repeat kinase 2	Homo sapiens	412-773	182-502	94.9	15
215	gi|32813449|ref|NP_872402.1| hypothetical protein LOC285905	Homo sapiens	480-701	159-314	94.8	19
216	gi|38142464|ref|NP_071353.3| hypothetical protein LOC63897	Homo sapiens	356-781	505-880	94.7	19
217	gi|113429989|ref|XP_932146.2| PREDICTED: similar to amrmadillo repeat containing, X-linked 6 (H. sapiens)-like	Homo sapiens	518-701	30-173	94.5	17
218	gi|50726994|ref|NP_061864.2| DKFZp434A0131 protein isoform 1	Homo sapiens	511-638	16-115	94.4	23
219	gi|22094987|ref|NP_065812.1| raptor	Homo sapiens	367-638	470-671	94.2	15
220	gi|17137182|ref|NP_477152.1| CG1451-PA	Drosophila melanogaster	537-767	357-607	93.8	20
221	gi|19913416|ref|NP_570603.2| adaptor-related protein complex 2, alpha 1 subunit isoform 2	Homo sapiens	352-784	78-396	93.5	15
222	gi|24581942|ref|NP_608935.2| CG31989-PA	Drosophila melanogaster	414-638	433-609	93.4	14
223	gi|24651131|ref|NP_651722.1| CG1973-PA	Drosophila melanogaster	230-638	192-534	93.4	14
224	gi|21361794|ref|NP_060918.2| TIP120 protein	Homo sapiens	362-784	516-883	93.3	15
225	gi|17647193|ref|NP_523400.1| CG6223-PA	Drosophila melanogaster	236-697	68-472	93.2	14
226	gi|113415138|ref|XP_942334.2| PREDICTED: similar to SVH protein	Homo sapiens	573-781	68-250	93	17
227	gi|13124773|ref|NP_057542.2| brain protein 16	Homo sapiens	434-775	17-329	91.9	15
228	gi|4826952|ref|NP_005038.1| proteasome 26S non-ATPase subunit 5	Homo sapiens	467-772	34-263	91.7	18
229	gi|19913414|ref|NP_055018.2| adaptor-related protein complex 2, alpha 1 subunit isoform 1	Homo sapiens	352-784	78-396	91.5	16
230	gi|20129465|ref|NP_609548.1| CG5336-PA	Drosophila melanogaster	399-636	118-298	91.3	17
231	gi|24660607|ref|NP_729327.1| CG7915-PB, isoform B	Drosophila melanogaster	515-785	434-650	91.2	11
232	gi|47717104|ref|NP_057025.2| ATPase, H+ transporting, lysosomal 50/57 kDa, V1 subunit H isoform 1	Homo sapiens	364-784	47-459	91.1	20
233	gi|47717102|ref|NP_998785.1| ATPase, H+ transporting, lysosomal 50/57 kDa, V1 subunit H isoform 2	Homo sapiens	364-784	47-459	91.1	20
234	gi|55749689|ref|NP_055746.2| SAPS domain family, member 1	Homo sapiens	273-561	159-408	91	19
235	gi|38679900|ref|NP_612377.2| hypothetical protein LOC91056	Homo sapiens	624-778	158-287	90.9	22
236	gi|18644734|ref|NP_110517.2| beta catenin-like 1	Homo sapiens	314-700	143-517	90.3	19
237	gi|21358121|ref|NP_652606.1| CG12132-PA	Drosophila melanogaster	474-784	443-1738	90.2	16
238	gi|19921692|ref|NP_610216.1| CG3274-PA	Drosophila melanogaster	389-648	310-542	90.2	13
239	gi|19923566|ref|NP_065731.2| SCY1-like 1	Homo sapiens	241-638	203-534	89.8	16
240	gi|24647339|ref|NP_732105.1| CG5000-PA	Drosophila melanogaster	588-784	20-191	89.6	17
241	gi|7657269|ref|NP_055847.1| androgen-induced prostate proliferative shutoff associated protein	Homo sapiens	392-788	276-612	89.4	15
242	gi|51972196|ref|NP_001004307.1| hypothetical protein LOC339541	Homo sapiens	367-678	59-282	89.1	19
243	gi|7019375|ref|NP_037373.1| formin homology 2 domain containing 1	Homo sapiens	577-776	129-326	88.8	15
244	gi|62909992|ref|NP_055525.2| G protein-coupled receptor associated sorting protein 1	Homo sapiens	488-772	157-1390	88.6	18
245	gi|89062260|ref|XP_946284.1| PREDICTED: similar to ataxia telangiectasia and Rad3 related protein	Homo sapiens	451-739	342-632	87.6	17
246	gi|45550133|ref|NP_608968.2| CG14001-PA	Drosophila melanogaster	270-541	427-653	87.5	16
247	gi|39780552|ref|NP_060522.3| Vac14 homolog	Homo sapiens	456-784	106-469	87.3	17
248	gi|45549088|ref|NP_477268.2| CG3423-PA	Drosophila melanogaster	460-638	253-431	87.2	23
249	gi|24651092|ref|NP_651709.1| CG1911-PA	Drosophila melanogaster	456-788	050-1309	87	16
250	gi|29029559|ref|NP_001307.2| CSE1 chromosome segregation 1-like protein	Homo sapiens	271-784	94-529	86.4	16
251	gi|18921143|ref|NP_572488.1| CG12113-PA	Drosophila melanogaster	365-784	133-495	86.4	16
252	gi|4502325|ref|NP_001175.1| ataxia telangiectasia and Rad3 related protein	Homo sapiens	451-739	624-914	85.9	17
253	gi|24647430|ref|NP_732137.1| CG14881-PA, isoform A	Drosophila melanogaster	470-639	2-132	85.7	18
254	gi|24646822|ref|NP_731905.1| CG31320-PA	Drosophila melanogaster	278-788	14-408	85.5	18
255	gi|113414418|ref|XP_935082.2| PREDICTED: similar to serine/threonine kinase 36 (fused homolog, Drosophila) isoform 1	Homo sapiens	347-740	446-811	85.4	15
256	gi|41281521|ref|NP_055680.2| chromosome condensation-related SMC-associated protein 1	Homo sapiens	456-786	030-1287	84.3	15
257	gi|113414947|ref|XP_950751.2| PREDICTED: similar to serine/threonine kinase 36 (fused homolog, Drosophila) isoform 12	Homo sapiens	347-740	446-811	83.7	15
258	gi|113414949|ref|XP_947148.2| PREDICTED: similar to serine/threonine kinase 36 (fused homolog, Drosophila) isoform 11	Homo sapiens	347-740	446-811	83.7	15
259	gi|45550562|ref|NP_648173.2| CG7915-PA, isoform A	Drosophila melanogaster	515-774	460-723	83.6	12
260	gi|24640048|ref|NP_572294.1| CG4320-PA	Drosophila melanogaster	265-784	504-985	81.5	15
261	gi|31377744|ref|NP_060272.2| HEAT repeat containing 2	Homo sapiens	301-789	15-432	81.1	13
262	gi|62243696|ref|NP_005853.2| stromal antigen 1	Homo sapiens	355-734	192-489	80.3	16
263	gi|13994240|ref|NP_114145.1| maestro	Homo sapiens	575-789	15-209	79.9	11
264	gi|87298935|ref|NP_078988.2| engulfment and cell motility 3	Homo sapiens	382-636	158-348	79.1	17
265	gi|25092658|ref|NP_689956.1| hypothetical protein LOC221927	Homo sapiens	625-784	424-572	78.7	16
266	gi|8922555|ref|NP_060627.1| resistance to inhibitors of cholinesterase 8 homolog B	Homo sapiens	457-687	60-288	76.2	14
267	gi|24585079|ref|NP_609922.2| CG18398-PA	Drosophila melanogaster	411-788	471-833	75.7	17
268	gi|24584736|ref|NP_523588.2| CG13281-PA	Drosophila melanogaster	365-784	132-532	75.5	11
269	gi|31563531|ref|NP_006594.3| stromal antigen 2	Homo sapiens	331-638	94-398	75	16
270	gi|20129889|ref|NP_610719.1| CG17509-PA	Drosophila melanogaster	392-787	267-582	74.9	15
271	gi|24667856|ref|NP_524651.2| CG32435-PA, isoform A	Drosophila melanogaster	358-784	19-512	74.8	20
272	gi|24667864|ref|NP_730597.1| CG32435-PC, isoform C	Drosophila melanogaster	358-784	19-512	74.8	20
273	gi|24667860|ref|NP_730596.1| CG32435-PB, isoform B	Drosophila melanogaster	358-784	19-512	74.8	20
274	gi|14249316|ref|NP_116103.1| hypothetical protein LOC84800	Homo sapiens	604-765	66-233	74.8	17
275	gi|47717100|ref|NP_998784.1| ATPase, H+ transporting, lysosomal 50/57 kDa, V1 subunit H isoform 1	Homo sapiens	364-784	47-441	74.7	14
276	gi|62122917|ref|NP_001014364.1| filaggrin 2	Homo sapiens	384-532	1990-05-01	73.2	22
277	gi|19922326|ref|NP_611044.1| CG30467-PA	Drosophila melanogaster	598-737	113-246	72.8	18
278	gi|18765700|ref|NP_055615.8| engulfment and cell motility 1 isoform 1	Homo sapiens	382-775	105-516	72.1	15
279	gi|56687503|ref|NP_060968.2| protein phosphatase 4, regulatory subunit 1-like	Homo sapiens	517-640	35-128	71.4	14
280	gi|24639048|ref|NP_569900.3| CG14622-PA, isoform A	Drosophila melanogaster	582-773	107-295	70.8	18
281	gi|22547123|ref|NP_002537.2| osteoprotegerin precursor	Homo sapiens	627-738	247-336	70.7	22
282	gi|7662228|ref|NP_055656.1| synaptosomal-associated protein, 91kDa homolog	Homo sapiens	265-452	118-301	70.1	12
283	gi|45551850|ref|NP_731316.2| CG9755-PB, isoform B	Drosophila melanogaster	519-789	761-1064	69.9	13
284	gi|4826934|ref|NP_005125.1| protein phosphatase 4, regulatory subunit 1	Homo sapiens	484-784	645-875	69.8	15
285	gi|24639046|ref|NP_726724.1| CG14622-PB, isoform B	Drosophila melanogaster	582-774	146-335	68.9	17
286	gi|113412358|ref|XP_001127437.1| PREDICTED: similar to Hornerin	Homo sapiens	384-531	1989-05-01	67.9	24
287	gi|7106299|ref|NP_037368.1| ataxin 10	Homo sapiens	485-611	328-454	67.8	15
288	gi|6382071|ref|NP_009293.1| diaphanous 2 isoform 12C	Homo sapiens	589-785	165-385	67.7	19
289	gi|113412360|ref|XP_001127446.1| PREDICTED: similar to filaggrin 2	Homo sapiens	384-537	1995-05-01	66.8	21
290	gi|24655192|ref|NP_612109.2| CG13916-PA	Drosophila melanogaster	418-637	127-302	66.6	15
291	gi|57864582|ref|NP_001009931.1| hornerin	Homo sapiens	384-532	1990-05-01	66.4	24
292	gi|21071077|ref|NP_055807.1| dishevelled-associated activator of morphogenesis 1	Homo sapiens	582-776	140-331	66.2	14
293	gi|17136972|ref|NP_477024.1| CG11312-PA	Drosophila melanogaster	430-789	418-690	65.3	16
294	gi|21358011|ref|NP_651655.1| CG1951-PA	Drosophila melanogaster	236-635	232-538	65.2	19
295	gi|24639283|ref|NP_525042.2| CG3707-PA, isoform A	Drosophila melanogaster	603-785	332-1596	63.8	19
296	gi|24639044|ref|NP_726723.1| CG14622-PC, isoform C	Drosophila melanogaster	582-774	448-637	63.6	17
297	gi|40068464|ref|NP_065783.2| AT rich interactive domain 1B (SWI1-like) isoform 2	Homo sapiens	433-684	952-2188	63.3	15
298	gi|40548415|ref|NP_056160.2| dishevelled associated activator of morphogenesis 2	Homo sapiens	604-773	146-324	63.3	17
299	gi|37537701|ref|NP_055493.2| SAPS domain family, member 2	Homo sapiens	264-561	96-386	63.1	14
300	gi|24644075|ref|NP_649496.1| CG17735-PA	Drosophila melanogaster	479-770	208-440	61.8	15
301	gi|66932909|ref|NP_001018494.1| pumilio 1 isoform 1	Homo sapiens	385-681	900-1146	61.3	14
302	gi|19718769|ref|NP_573403.1| engulfment and cell motility 2	Homo sapiens	399-636	111-299	60.9	15
303	gi|33469947|ref|NP_877496.1| engulfment and cell motility 2	Homo sapiens	399-636	111-299	60.9	15
304	gi|20130317|ref|NP_611838.1| CG5554-PA	Drosophila melanogaster	324-374	143-201	60.9	20
305	gi|5453998|ref|NP_006382.1| importin 7	Homo sapiens	284-784	199-662	60.8	15
306	gi|19920548|ref|NP_608648.1| CG7261-PA	Drosophila melanogaster	457-784	455-721	60.5	11
307	gi|66348037|ref|NP_036265.2| coatomer protein complex, subunit gamma 2	Homo sapiens	510-653	112-219	60.1	25
308	gi|24646316|ref|NP_650208.1| CG5608-PA	Drosophila melanogaster	359-784	43-417	59.9	16
309	gi|113421981|ref|XP_001124974.1| PREDICTED: hypothetical protein LOC159491	Homo sapiens	270-552	386-654	58.6	14
310	gi|113421505|ref|XP_001124973.1| PREDICTED: hypothetical protein LOC159491	Homo sapiens	270-552	386-654	58.6	14
311	gi|24647757|ref|NP_524392.2| CG7467-PB, isoform B	Drosophila melanogaster	522-735	337-2496	58.1	21
312	gi|24647755|ref|NP_732263.1| CG7467-PA, isoform A	Drosophila melanogaster	522-735	324-2483	57.7	21
313	gi|24649005|ref|NP_651044.1| CG12499-PA	Drosophila melanogaster	390-762	657-1979	57.6	13
314	gi|21356393|ref|NP_649519.1| CG12005-PB	Drosophila melanogaster	353-735	654-946	57.4	12
315	gi|17737673|ref|NP_524177.1| CG6975-PA	Drosophila melanogaster	31-768	109-764	57	13
316	gi|40068462|ref|NP_787059.2| AT rich interactive domain 1B (SWI1-like) isoform 3	Homo sapiens	433-685	939-2176	55.5	15
317	gi|68533226|ref|NP_001020373.1| STAG3-like	Homo sapiens	580-643	1966-03-01	54.4	19
318	gi|57164942|ref|NP_001008938.1| colonic and hepatic tumor over-expressed protein isoform a	Homo sapiens	365-784	701-1045	54.3	14
319	gi|59891448|ref|NP_689969.2| rapamycin-insensitive companion of mTOR	Homo sapiens	324-784	542-975	54.2	19
320	gi|39930397|ref|NP_065196.1| hypothetical protein LOC57223	Homo sapiens	333-733	142-552	54.2	14
321	gi|57863310|ref|NP_036579.2| stromal antigen 3	Homo sapiens	355-743	205-511	53.7	16
322	gi|60097902|ref|NP_002007.1| filaggrin	Homo sapiens	384-531	1989-05-01	53.7	19
323	gi|29336083|ref|NP_079415.2| armadillo repeat containing 9	Homo sapiens	288-785	100-571	53.5	17
324	gi|5901980|ref|NP_008962.1| heat shock transcription factor 2 binding protein	Homo sapiens	517-637	228-327	50.6	20
325	gi|31742532|ref|NP_005210.2| diaphanous 1	Homo sapiens	536-775	143-351	50.3	16
326	gi|13491168|ref|NP_056132.1| pumilio homolog 2	Homo sapiens	385-718	778-1052	50.1	16
327	gi|24648619|ref|NP_650940.2| CG7044-PA	Drosophila melanogaster	384-646	460-756	50	23
328	gi|40068466|ref|NP_059989.1| AT rich interactive domain 1B (SWI1-like) isoform 1	Homo sapiens	433-685	992-2229	49.5	15
329	gi|45553399|ref|NP_996228.1| CG7467-PC, isoform C	Drosophila melanogaster	522-735	177-2336	49.1	20
330	gi|21359945|ref|NP_071741.2| chromosome condensation protein G	Homo sapiens	466-782	48-305	48.4	14
331	gi|23397603|ref|NP_569860.2| CG16989-PA	Drosophila melanogaster	249-789	250-730	48.3	18
332	gi|21264565|ref|NP_006006.3| AT rich interactive domain 1A isoform a	Homo sapiens	433-685	046-2283	48.1	15
333	gi|21264575|ref|NP_624361.1| AT rich interactive domain 1A isoform b	Homo sapiens	476-685	853-2066	46.2	15
334	gi|50726989|ref|NP_001002840.1| DKFZp434A0131 protein isoform 2	Homo sapiens	580-638	1961-03-01	42.7	19
335	gi|17137712|ref|NP_477454.1| CG6582-PA	Drosophila melanogaster	612-700	64-155	41.5	14
336	gi|89274175|ref|NP_001034795.1| hypothetical protein LOC79846	Homo sapiens	530-738	408-593	41.4	16
337	gi|5730015|ref|NP_006686.1| RaP2 interacting protein 8	Homo sapiens	455-536	103-204	41	14
338	gi|73695475|ref|NP_060542.4| protein BAP28	Homo sapiens	305-634	234-541	39	12
339	gi|27414491|ref|NP_056254.1| coiled-coil domain containing 28A	Homo sapiens	408-436	168-193	38.9	38
340	gi|4507693|ref|NP_000359.1| tuberous sclerosis 1 protein isoform 1	Homo sapiens	615-740	10-140	38.7	17
341	gi|19921068|ref|NP_609389.1| CG5366-PA	Drosophila melanogaster	269-781	253-715	37.4	14
342	gi|24582350|ref|NP_609079.2| CG10805-PA	Drosophila melanogaster	423-635	891-2082	36.8	16
343	gi|17136910|ref|NP_476981.1| CG1768-PA, isoform A	Drosophila melanogaster	611-773	164-342	36.8	18
344	gi|24585494|ref|NP_724285.1| CG1768-PB, isoform B	Drosophila melanogaster	611-773	164-342	36.8	18
345	gi|72534670|ref|NP_001026859.1| phospholipase A2-activating protein isoform 1	Homo sapiens	630-781	613-749	36.8	15
346	gi|24645278|ref|NP_649868.1| CG9746-PA	Drosophila melanogaster	454-740	408-689	36.6	14
347	gi|27883866|ref|NP_068751.4| resistance to inhibitors of cholinesterase 8 homolog A	Homo sapiens	457-784	60-405	35.8	15
348	gi|31317268|ref|NP_848698.1| WD repeat and FYVE domain containing 3 isoform 2	Homo sapiens	270-552	384-658	34.4	14
349	gi|7662452|ref|NP_056054.1| ATP/GTP binding protein 1	Homo sapiens	531-789	4-232	34.2	17
350	gi|15451889|ref|NP_038473.2| glutamate decarboxylase 1 isoform GAD25	Homo sapiens	590-670	123-216	33.6	14
351	gi|7661968|ref|NP_055481.1| epsin 4	Homo sapiens	587-780	3-153	33.4	15
352	gi|24643413|ref|NP_608361.2| CG15618-PA	Drosophila melanogaster	584-789	061-1289	33.1	18
353	gi|4758934|ref|NP_004244.1| phospholipase A2-activating protein isoform 2	Homo sapiens	630-781	556-692	30.9	15
354	gi|56699468|ref|NP_001008567.1| tuberous sclerosis 1 protein isoform 2	Homo sapiens	611-740	6-140	30.9	14
355	gi|4507869|ref|NP_003361.1| vasodilator-stimulated phosphoprotein isoform 1	Homo sapiens	40-85	337-375	30.8	28
356	gi|5803003|ref|NP_006720.1| diaphanous 2 isoform 156	Homo sapiens	589-785	165-385	30.7	19
357	gi|19920554|ref|NP_608652.1| CG10874-PA, isoform A	Drosophila melanogaster	408-436	214-239	30.5	31
358	gi|57222563|ref|NP_055571.2| colonic and hepatic tumor over-expressed protein isoform b	Homo sapiens	366-784	702-1045	30	15
359	gi|24308239|ref|NP_065941.1| p90 autoantigen	Homo sapiens	490-704	59-231	29.6	16
360	gi|45551388|ref|NP_726796.2| CG3707-PB, isoform B	Drosophila melanogaster	403-754	489-874	29.3	15
361	gi|40254947|ref|NP_066979.2| thioredoxin domain containing 13	Homo sapiens	324-374	144-202	28.6	20
362	gi|24415383|ref|NP_055204.1| proline-, glutamic acid-, leucine-rich protein 1	Homo sapiens	287-409	109-222	28.2	14
363	gi|13491166|ref|NP_055491.1| pumilio 1 isoform 2	Homo sapiens	530-789	905-1152	27.9	15
364	gi|24645492|ref|NP_649937.1| CG16908-PA	Drosophila melanogaster	587-681	648-741	27.9	10
365	gi|53759103|ref|NP_006381.2| importin 8	Homo sapiens	285-784	201-662	27.5	12
366	gi|10938008|ref|NP_066399.1| tuberous sclerosis 2 isoform 2	Homo sapiens	463-739	358-621	26.7	16
367	gi|45549365|ref|NP_572862.2| CG12096-PA	Drosophila melanogaster	269-650	92-447	26.2	15
368	gi|28573153|ref|NP_788604.1| CG9755-PE, isoform E	Drosophila melanogaster	385-687	565-813	25.5	15
369	gi|24639818|ref|NP_726978.1| CG6775-PB, isoform B	Drosophila melanogaster	588-783	692-895	25.1	18
370	gi|24639816|ref|NP_524762.1| CG6775-PA, isoform A	Drosophila melanogaster	588-783	754-957	25	18
371	gi|28571157|ref|NP_572550.2| CG15797-PA	Drosophila melanogaster	457-687	60-290	24.7	15
372	gi|50345833|ref|NP_653188.2| BTB (POZ) domain containing 16	Homo sapiens	589-683	233-347	24.5	16
373	gi|31317272|ref|NP_055806.2| WD repeat and FYVE domain containing 3 isoform 1	Homo sapiens	270-552	384-658	24	14
374	gi|20336267|ref|NP_619525.1| ADP-ribosylation factor binding protein 3 isoform long	Homo sapiens	612-706	47-140	23.3	15
375	gi|21355331|ref|NP_648315.1| CG3529-PB	Drosophila melanogaster	570-637	60-130	23.2	24
376	gi|13569887|ref|NP_112187.1| calcium binding protein 39-like isoform 2	Homo sapiens	474-735	18-228	23	18
377	gi|62865871|ref|NP_060137.2| hypothetical protein LOC55610 isoform a	Homo sapiens	390-519	780-884	22.5	20
378	gi|21040255|ref|NP_631907.1| splicing factor, arginine/serine-rich 12	Homo sapiens	297-366	21-96	22.3	13
379	gi|24652022|ref|NP_610467.1| CG8014-PA	Drosophila melanogaster	315-527	398-1582	22.2	15
380	gi|45551044|ref|NP_724798.2| CG1884-PB, isoform B	Drosophila melanogaster	258-467	651-1825	21.8	17
381	gi|24652987|ref|NP_610765.1| CG13162-PA	Drosophila melanogaster	578-743	665-857	21.8	14
382	gi|24654575|ref|NP_611258.2| CG4996-PA	Drosophila melanogaster	334-528	719-867	21.5	16
383	gi|5453573|ref|NP_006411.1| ADP-ribosylation factor guanine nucleotide-exchange factor 2	Homo sapiens	265-601	135-1461	20.9	15
384	gi|113429655|ref|XP_001129019.1| PREDICTED: similar to SAPS domain family member 2	Homo sapiens	338-433	334-476	20.8	26
385	gi|24643068|ref|NP_573309.1| CG15047-PA	Drosophila melanogaster	7-20	92-105	20.3	43
386	gi|24643396|ref|NP_608355.1| CG12702-PA	Drosophila melanogaster	335-753	39-399	20.1	16
387	gi|45550392|ref|NP_610497.3| CG1884-PA, isoform A	Drosophila melanogaster	258-467	653-1827	20	17
