# Supplementary material for: The E2 Marie Kondo and the CTLH E3 ligase clear deposited RNA binding proteins during the maternal-to-zygotic transition
Source: eLife journal article supplement (doi:10.7554/elife.53889), 2020-06-23
Supplement: supp [file elife-53889-supp-v1.zip]

A Known secondary structure                    bbbbbbbbbbb   SSS SS       bbbbb  
Gid1                                            371   IFYYEIKVLSV**TSTES**AENSNIVIGYK  
RanBPM                                        476   LYYFEVRIIS.....KGRNGYMGIGLT  
Predicted secondary structure            bbbbbbbbbbb.....       bbbbbbb

B Known secondary structure                    aaaaaaaaaaaaaaaaaaaaaaaaaaaaaaTTT SS   SSS TTS    SS   B   SSSSSS S S                    S TTT  
Gid8                                            279   SISLRSKIADLVNEKLLKFIHPRIQFEISNNNSKFPDLLNSDKKIITQNFTVYNNNLVNGSNGTKITHISSDQPINEKMANSVWLN  
Hou                                            162   EQSYRQKIASELNSAILR.....CEQSED.....  
Predicted secondary structure            aaaaaaaaaaaaaaaaa.....aa                    .....

Known secondary structure                    TT   aaaaaaTT   B   aaaaaSTTS   aaaaaaaaaaaaaaaaaaTTbb  
Gid8                                            365   QRAATTFFHNLENKNYWNQTSELLFNYYSSSEFPYEPRLTQIMKLWCWCENQLHHNQIGVPRVEN  
Hou                                            186   .....STPKMMFLLKLILWAQSKLDSRSISYPKMKN  
Predicted secondary structure            .....                    aaaaaaaaaaaaaaaaa       aaaaa

a: α helix  
b: β sheet  
S: bend  
T: hydrogen-bonded turn  
. : missing residue
