# Supplementary figures and images for: The E2 Marie Kondo and the CTLH E3 ligase clear deposited RNA binding proteins during the maternal-to-zygotic transition
Source: eLife journal article supplement (doi:10.7554/elife.53889), 2020-06-23

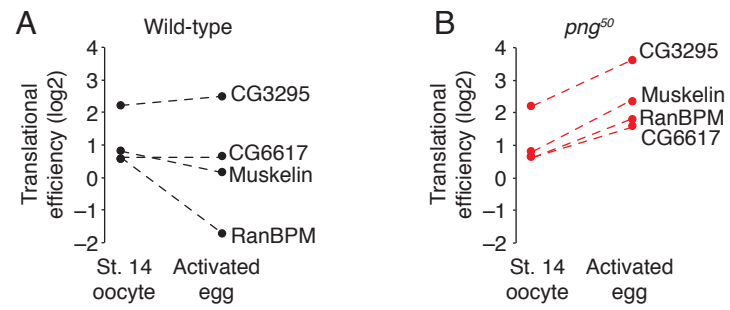

Supplement: supp [file elife-53889-supp-v1.zip]

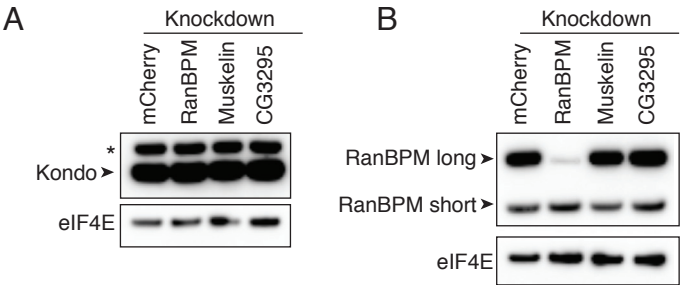

Supplement: supp [file elife-53889-supp-v1.zip]
